# Supplementary material
Source: Research Square preprint supplement (doi:10.21203/rs.3.rs-9001774/v1)
Supplement: Supplementary file 1 [file 27e7edff8f463b038c278ed8.xlsx]

## Sheet: 2018-2022
Country name	Unemployment Benefits (UB)	UB name in national language	Social Assistance (SA)	SA name in national language	Housing Benefits (HB)	HB name in national language	Family Benefits (FB)	FB name in national language	In-Work Benefits (IW)	IW name in national language	Income Taxes (IT)	Social Security Contributions by employees (SC)
Australia	1. Newstart Allowance (until 2020) 2. Youth Allowance 3. JobSeeker Payment (since 2021) Energy Supplements and Coronavirus Supplement (2021 only) included	1. Newstart Allowance (until 2020) 2. Youth Allowance 3. JobSeeker Payment (since 2021) Energy Supplements and Coronavirus Supplement (2021 only) included	When modelling a family claiming minimum-income benefits, Newstart Allowance and Youth Allowance are classified as social assistance (SA) since these are the principal minimum-income benefits for non-disabled working age people in Australia	N/A	1. Commonwealth Rent Assistance	1. Commonwealth Rent Assistance	1. Family Tax Benefit Part A 2. Family Tax Benefit Part B 3. Single Income Family Supplement (until 2018) 3. Parenting Payment (including telephone and pharmaceutical allowances and Coronavirus Supplement (2021 only))	1. Family Tax Benefit Part A 2. Family Tax Benefit Part B 3. Single Income Family Supplement (until 2018) 3. Parenting Payment (including telephone and pharmaceutical allowances and Coronavirus Supplement (2021 only))	N/A	…	1. Personal income tax (national level) 2. Medicare levy	None Non-tax compulsory payment: 1. Superannuation Guarantee
Austria	1. Unemployment benefit 2. Unemployment assistance	1. Arbeitslosengeld 2. Notstandshilfe	1. Means-tested minimum income - rules for Vienna modelled A supplement to means-tested minimum income (SA) that covers housing costs is included in Housing Benefits (HB).	1. Bedarfsorientierte Mindestsicherung	1. Housing support - rules for Vienna modelled 2. A supplement to means-tested minimum income (SA) that covers housing costs is also included in Housing Benefits (HB).	1. Wohnbeihilfe 2. Mindestsicherung/Sozialhilfe - Mietbeihilfe	1. Family benefit (newly translated instead of allowance) (including School Bonus and multiple child bonus) 2. Child tax credit 3. Child-care benefits for formal centre-based care 4. COVID-19 Act against poverty: COVID-19 hardship fund for families 5. Climate Bonus (from August 2022) 6. Energy Bonus (from March 2022)	1. Familienbeihilfe (inkl. Schulstartgeld und Mehrkindzuschlag) 2. Kinderabsetzbetrag 3. Kinderbetreuungsgeld 4. Bundesgesetz zur Bekämpfung pandemiebedingter Armutsfolgen 5. Klimabonus (from August 2022) 6. Energiekostenausgleich (from March 2022)	1. In-work benefit	1. Kombilohnbeihilfe	1. Personal income tax (Einkommensteuer)	1. Health insurance 2. Unemployment insurance 3. Pension insurance 4. Contribution to the labour chamber 5. Contribution for the promotion of residential building
Belgium	1. Unemployment benefit after employment 2. Unemployment benefit after studies 3. Unemployment benefit for old workers	1. Assurance chômage 2. Allocation d'insertion 3. Régime de chômage avec complément d’entreprise	1. Guaranteed minimum income benefit	1. Revenu de Moyens d’Existence et d’intégration (Minimex)	N/A	…	1. Family benefit - rules for Wallonia modelled	1. Allocations familiales	1. Lone parent child care benefit	1. Complément de garde d'enfant	1. Personal income tax 2. Additional taxes (Taxes additionnelles) - municipal tax	1. Unemployment insuranceHealth insurance 2. Health insurance 3. Health care 4. Pension insurance 5. Special social security contribution
Bulgaria	1. Unemployment insurance	1. Обезщетение за безработица	1. Social assistance 2. Social assistance for heating	1. Социална помощ 2. целева помощ за отопление	N/A	N/A	1. Family benefit 2. First grade school allowance 3. Alimony advance payment	1. Месечни помощи за дете 2. Еднократна помощ за деца записани в първи клас 3. Изплащане на присъдена издръжка от държавата	N/A	…	1. Personal income tax	1. Pensions 2. General disease and motherhood 3. Unemployment 4. Health Insurance
Canada	1. Employment Insurance 2. Canada Emergency Response Benefit (2021 only)	1. Employment Insurance 2. Canada Emergency Response Benefit (2021 only)	1. Social Assistance (Ontario Works)	1. Social Assistance (Ontario Works)	N/A	…	1. Canada Child Benefit (federal level) 2. Ontario Child Benefit (regional level)	1. Canada Child Benefit (federal level) 2. Ontario Child Benefit (regional level)	1. Canada Workers Benefit	1. Canada Workers Benefit	1. Personal income tax (national/federal) 2. Personal income tax (Provinces and territories - Ontario modelled)	1. Pensions (Canada Pension Plan) 2. Sickness (Ontario Health Premium) 3. Unemployment (Employment Insurance scheme)
Croatia	1.Unemployment cash benefit	1. Novčana naknada za vrijeme nezaposlenosti	1. Guaranteed minimum benefit	1. Zajamčena minimalna naknada	1. Assistance in settling of housing costs	1. Naknada za troškove stanovanja	1. Child allowance 2. Subsidy for stay-at-home parent (city of Zagreb) (2017-2021)	1. Doplatak za djecu 2. Novčana pomoć za roditelja odgojitelja (city of Zagreb) (2017-2021)	N/A	…	1. Personal income tax (Porez na dohodak) - national level 2. Surtax (Prirez) - regional level (City of Zagreb modelled)	1. Pensions
Cyprus	1. Unemployment benefit	1. ανεργιακό επίδομα	1. Guaranteed minimum income (since 2015)	1. Ελάχιστο εγγυημένο εισόδημα (since 2015)	1. Housing allowance (since 2015) - rates for Nicosia-Limassol-Famagusta (2015-2019); rates for Nicosia (since 2020)	1. Επιχορήγηση για το ενοίκιο και τους τόκους στεγαστικού δανείου (since 2015)	1. Child benefit 2. Single parent benefit	1. Επίδομα τέκνου 2. Επίδομα μονογονεϊκής οικογένειας	N/A	…	1. Personal income tax (φόρος εισοδήματος)	1. Social Insurance Fund
Czech Republic	1. Means tested unemployment benefit	1. Podpora v nezaměstnanosti	1. Allowance for living	1. příspěvek na živobytí	1. Housing allowance	1. Příspěvek na bydlení	1. Child allowance 2. Parental allowance	1. Přídavek na dítě 2. Rodičovský příspěvek	N/A	…	1. Personal income tax	1. Health insurance 2. Social Insurance - Pension
Denmark	1. Unemployment insurance	1. Arbejdsløshedsdagpenge og andre Akasseydelser	1. Guaranteed minimum income benefit Recipients of guaranteed minimum income benefit (SA) can receive a specific additional housing benefit (see HB).	1. Kontanthjælp	1. Housing benefit 2. Special housing benefit for people on social assistance	1. Boligsikring 2. Særlig støtte	1. Child and youth allowance 2. Ordinary and extra child allowance to lone parents, and advance payment of child support 3. Temporary child benefit (since 2020)	1. Børne- og ungeydelse 2. Ordinært børnetilskud; ekstra børnetilskud; forskudsvis udbetalt børnebidrag 3. Midlertidigt børnetilskud	N/A	…	1. Personal income tax 2. Local income tax (Kommuneskat - average rate modelled)	1. Unemployment insurance (A-kassebidrag) 2. Voluntary early retirement scheme (Efterlønsbidrag) Non-tax compulsory payment: 1. Compulsory fixed contribution to the Supplementary Labour Market Pension Scheme (ATP-bidrag) Unemployment Insurance benefit recipients contribute to the supplementary pension scheme and the unemployment insurance fund. Social assistance recipients pay the supplementary p…
Estonia	1. Unemployment insurance 2. Unemployment allowance	1. Töötuskindlustushüvitis 2. Töötutoetus	1. Subsistence benefit A supplement to subsistence benefit (SA) that covers housing costs is included in Housing Benefits (HB).	1. toimetulekutoetus	A supplement to subsistence benefit (SA) that covers housing costs is included in Housing Benefits (HB).	…	1. Child allowance 2. Child care allowance (until 2019) 3. Maintenance allowance (since 2017)	1. Lapsetoetus 2. Lapsehooldustasu (until 2019) 3. Elatisabi (since 2017)	N/A	…	1. Personal income tax (üksikisiku tulumaks)	1. Unemployment insurance premium Non-tax compulsory payment: 1. Pension insurance contribution (until 2020)
Finland	1. Basic unemployment allowance 2. Earnings-related unemployment allowance 3. Labour market subsidy	1.Peruspäiväraha 2. Ansiosidonnainen työttömyyspäiväraha 3. Työmarkkinatuki	1. Social assistance A supplement to social assistance (SA) that covers housing costs is included in Housing Benefits (HB).	1. Toimeentulotuki	1. General Housing Allowance - rates for Helsinki modelled A supplement to social assistance (SA) that covers housing costs is also included in Housing Benefits (HB).	1. Yleinen asumistuki	1. Child benefit 2. Maintenance allowance 3. Home care allowance + supplement for Helsinki (until 2021) 4. Flexible care allowance 5. Partial care allowance	1. Lapsilisä 2. Elatustuki 3. Lasten kotihoidon tuki 4. Joustava hoitoraha 5. Osittainen hoitoraha	1. Earned income allowance The reduction in taxes and social contributions due to earned income allowance is included in IW 2. Earned income tax credit	1. Kunnallisverotuksen ansiotulovähennys 2. Työtulovähennys	1. Central government income tax (Valtion tulovero) 2. Local government income tax (Kunallisvero - average rate modelled) 3. Broadcasting Tax (Yleisradiovero)	1. Earnings-related pension contribution 2. Unemployment insurance contribution 3. Daily allowance contribution 4. Medical care contribution Unemployment Benefit recipients pay the Medical care contribution
France	1. Unemployment insurance 2. Unemployment assistance	1. Assurance chômage (Allocation d'aide au retour à l'emploi) 2. Assistance chômage (Allocation de solidarité spécifique)	1. Guaranteed minimum income benefit	1. Revenu Solidarité Active	1. Housing benefit	1. Allocations logement	1. General family benefit 2. School allowance 3. Large family allowance 4. Lone-parent benefits 5. Young child benefit	1. Allocations Familiales 2. Allocation Rentrée Scolaire (ARS) 3. Complément Familial 4. Allocation de soutien familial 5. Allocation de base de la prestation d’accueil du jeune enfant	1. In-work benefits	1. Prime d’activité	1. Income tax (Impôt sur le revenu) 2. Universal social contribution (contribution sociale généralisée) 3. Contribution to the reimbursement of social debt (contribution au remboursement de la dette sociale)	1. Pension 2. Illness, pregnancy, disability, death 3. Unemployment 4. Other: • Supplemental pension for non-managers • AGFF (Association pour la gestion du fonds de financement) contribution Unemployment Insurance benefit recipients pay the pension contribution at a reduced rate
Germany	1. Unemployment insurance (unemployment benefit I) 2. Unemployment assistance (unemployment benefit II) (since 2005) A supplement to unemployment benefit II that covers housing costs (rules for Berlin modelled) is included in Housing Benefits (HB). Recipients of unemployment benefit II can also receive a special education and participation package (see FB).	1. Arbeitslosengeld I 2. Arbeitslosengeld II	When modelling a family claiming minimum-income benefits (Unemployment Benefit II, cp. UB), these are classified as Social Assistance (SA) in the model since this is the principal minimum-income benefit for non-disabled working age people in Germany and there is no separate SA for these people	N/A	1. Housing benefit under the Housing Allowance Act - rules for Berlin modelled 2. A supplement to unemployment benefit II that covers housing costs (rules for Berlin modelled) is also included in Housing Benefits (HB).	1. Wohngeld 2. Leistungen für Unterkunft und Heizung	1. Child benefit 2. Child supplement 3. Education and participation package for those receiveing unemployment benefit II 4. Mainenance advance for lone parents	1. Kindergeld 2. Kinderzuschlag 3. Bildungspaket 4. Unterhaltsvorschuss	N/A	…	1. Personal income tax (Einkommensteuer) 2. Solidarity surcharge (Solidaritätszuschlag)	1. Pension insurance (Deutsche Rentenversicherung) 2. Sickness insurance (Gesetzliche Krankenversicehrung) 3. Unemployment insurance (Arbeitslosenversicherung) 4. Health care insurance (Pflegeversicherung)
Greece	1. Unemployment insurance benefit 2. Unemployment benefit for long-term unemployed 3. Special aid after the end of payment of the unemployment allowance 4. Special aid for unemployed after a three-month registration	1. Τακτικη Επιδοτηση Ανεργιασ 2. Επίδομα Μακροχρονίως Ανέργων 3. Ειδικό βοήθημα μετά τη Λήξη της Τακτικής Επιδοτησης Ανεργίας 4. Ειδικό βοήθημα μετά από τρίμηνη παραμονή στο Μητρώο Ανέργων	1. Social Solidarity Income (2017-2020) 2. Guaranteed Minimum Income (since 2021)	1. Κοινωνικό Εισόδημα Αλληλεγγύης (2017-2020) 2. Ελάχιστο Εγγυημένο Εισόδημα (since 2021)	1. Rent allowance (2015-2016) 2. Housing Benefit (since 2020)	1. Επίδομα Ενοικίου (2015-2016) 2. Επίδομα Στέγασης (since 2020)	1. Child allowance (since 2018) 2. Single child support allowance (2013-2017) 3. Special benefit for large families (2013-2017) 4. Benefit for unprotected children (2001-2016) 5. Low income support for families with children in compulsory education (2003-2017)	1. Επίδομα Παιδιού (since 2018) 2. Ενιαίο Επίδομα Στήριξης Τέκνων (2013-2017) 3. Ειδικό Επίδομα Τρίτεκνων και Πολύτεκνων (2013-2017) 4. Επίδομα απροστάτευτων παιδιών (2001-2016) 5. Εισοδηματική ενίσχυση για οικογένειες με παιδιά στην υποχρεωτική εκπαίδευση (2003-2017)	N/A	…	1. Personal income tax (φόρος εισοδήματος φυσικών προσώπων) 2. Special solidarity contribution (Εισφορά αλληλεγγύης) - (suspended in 2021-2022)	1. Unified Social Security Institution (EFKA) • main pension for employees • healthcare coverage of employees 2. Unified Supplementary Social Security and Lump Sum Benefits Fund (ETEAEP) 3.Other Employees’ Contributions In each case, average rate modelled
Hungary	1. Unemployment benefit	2. Álláskeresési járadék	1. Employment substituting support	1. Foglalkoztatást helyettesítő támogatás	N/A	N/A	1. Family allowance 2. Regular child protection allowance 3. Childcare allowance 4. Child raising support	1. Családi pótlék 2. Rendszeres gyermekvédelmi kedvezmény 3. Gyermekgondozást segítő ellátás ‘GYES’ 4. Gyermeknevelési támogatás	N/A	…	1. Personal income tax	1. Pension contribution 2. Health insurance and labour market contribution Note: Unemployment insurance benefit recipients pay the pension contribution
Iceland	1. Unemployment insurance benefit	2. Atvinnuleysisdagpeningar	1. Municipality financial assistance - amounts for Reykjavik modelled	1. Fjárhagsaðstoð sveitarfélaga	1. Housing benefit (since 2017) 2. Rent benefit (unitl 2016)	1. Húsnæðisbætur (since 2017) 2. Húsaleigubætur (unitl 2016)	1. Family benefit 2. Lone parent mother/fatherhood allowance	1. Barnabætur 2. Mæðralaun/Feðralaun	N/A	…	1. Personal income tax (Tekjuskattur einstaklinga) 2. National Broadcasting Service fee	1. Construction Fund for the Elderly Non-tax compulsory payment: 1. Pension funds Unemployment insurance, Lone parent benefit and Social assistance recipients pay social contributions (but not non-tax compulsory payments)
Ireland	1. Jobseekers’ Benefit 2. Jobseekers’ Allowance 3. Jobseeker’s Transitional Payment 4. COVID-19 Pandemic Unemployment Payment 5. Part-time Job Incentive Scheme	1. Sochar Cuardaitheora Poist 2. Liúntas Cuardaitheora Poist 3. Socrú idirthréimhseach Liúntas Cuardaitheora 4. Íocaíocht Dífhostaíochta Phaindéimeach COVID-19 5. An Scéim Dhreasachta Poist Pháirtaimseartha	1. Supplementary Welfare Allowance	1. Liúntas Leasa Forlíontach	1. Rent Supplement - rates for Dublin modelled 2. Housing Assistance Payment - rates for Dublin City Council modelled	1. Forlíonadh Cíos 2. Íocaíocht Cúnaimh Tithíochta	1. Child benefit 2. One-Parent Family Payment (OFP)	1. Sochar Linbh 2. An Íocaíocht Theaghlaigh Aontuismitheora	1. Back to Work Family Dividend 2. Family Income Supplement (until 2018) 3. Working Family Payment (since 2018)	1. An Díbhinn Teaghlaigh um Fhilleadh ar Obair 2. Forlíonadh Ioncaim Teaghlaigh 3. Íocaíocht do Theaghlaigh i bhFostaíocht	1. Income tax 2. Universal Social Charge	1. Pension and social insurance
Israel	1. Unemployment benefit	1. (דמי אבטלה (יומיים))	1. Income support benefit	1. ((הגמלה להבטחת הכנסה)	1. Rental assistance	1. סיוע בשכר דירה	1. Child allowance 2. Study grant	קצבת ילדים) (מענק לימודים)	1. Earned income tax credit	…	1. Personal income tax	1. National Insurance branches 2. Health Non-tax compulsory payment: 1. Compulsory employment pension Unemployment insurance benefit recipients pay health insurance contributions
Italy	1. Unemployment benefit	1. Nuova assicurazione per l’impiego - NASPI	1. Social Assistance	1. Reddito di Inclusione (2018). Reddito di Cittadianza (2019-2023)	1. Refundable tax credit for rented accomodation	1. Detrazione per l'affitto	1. Universal Children allowance (from 2022) 1. Family allowance (until 2021) 2. Allowance for large families (until 2021) 3. Infant allowance (until 2021)	1. Assegno Unico e Universale (from 2022) 1. Assegni al Nucleo Familiare (until 2021) 2. Assegno per famiglie numerose (until 2021) 3. Bonus bebé (until 2021)	1. Fiscal bonus (2014-2022)	1. Bonus dipendendi (2014-2022)	1. Personal income tax (Imposta sui Redditi delle Persone Fisiche) 3. Regional surcharge tax - Lazio region modelled 4. Local surcharge tax - Municipality of Rome modelled	1. Pension 2. Sickness 3. Health 4. Unemployment
Japan	1. Employment insurance	1. Koyo hoken	1. Public assistance - rates for Tokyo modelled	1. Seikatsu hogo	1. Housing benefit - rates for Tokyo modelled (component of public assistance (SA) that covers housing costs)	N/A	1. Child allowance 2. Child rearing allowance 3. Special Benefit for Child-raising families (from 2021) 4. Special Benefit for Supporting Low-income households with Children (from 2021)	1. Jido teate 2. Jido fuyo teate 3. kosodate setaieno rinji tokubetsu kyuhu (from 2021) 4. kosodate setai seikatsu shien tokubetsu kyuhukin (from 2021)	1. Re-employment allowance	1. Saisyusyoku teate	1. Income tax (Shotoku zei) 2. Local income taxes (Jyumin zei - average rate modelled) 3. Special benefit for resident tax-exempted households (from 2022)	1. Pension 2. Sickness 3. Unemployment
Korea	1. Job-seeking allowance 2. Early Re-employment Allowance 3. National Employment Support Programme	1. 구직급여 2. 조기재취업수당 3. 국민취업지원제도	1. National Basic Livelihood Security	1. 국민기초생활보장제도	1. Housing benefit for rented accommodation - rates for Seoul modelled	1. 기초생활급여	1. Child benefit (since 2008) 2. Lone-parent support subsidy 3. Home care allowance: In-house Childcare Allowance and Newborn Benefit	1. 아동수당 2. 한부모 가족지원금 3. 가정양육수당, 영아수당	1. Early Re-employment Allowance (into-work provision of Unemployment Insurance programme) 2. Earned Income Tax Credit 3. Child Care Tax Credit	1. 조기재취업수당 2. 근로장려금 3. 자녀장려금	1. Personal income tax (소득세) 2. Local income tax (지방소득세 )	1. National pension contribution 2. Medical insurance premium 3. Unemployment insurance
Latvia	1. Unemployment benefit 2. Unemployment assistance benefit (2021)	1. Bezdarbnieka pabalsts 2. Bezdarbnieka palīdzības pabalsts (2021)	1. Guaranteed minimum income benefit (amounts for Riga modelled in 2005-2020; national rules since 2021)	1. Pabalsts garantētā minimālā ienākumu līmeņa nodrošināšanai; in 2021 renamed Garantētā minimālā ienākuma pabalsts	1. Housing benefit - rules for Riga modelled in 2005-2021; since 2022 national rules plus additional Riga rules	1. Dzīvokļa pabalsts (2005-2021); since 2022 renamed Mājokļa pabalsts	1. Family state benefit 2. Maintenance Guarantee Fund 3. Childcare benefit	1. Ģimenes valsts pabalsts 2. Uzturlīdzekļu garantiju fonds 3. Bērna kopšanas pabalsts	N/A	…	1. Personal income tax (Iedzīvotāju ienākuma nodoklis) 2. Solidarity tax (Solidaritātes nodoklis) (since 2016)	1. State pensions insurance 2. Unemployment insurance 3. Occupational accident insurance 4. Disability insurance 5. Maternity and sickness insurance 6. Parental insurance 7. Health insurance
Lithuania	1. Unemployment social insurance benefit 2. Jobseeker's benefit (2021)	1.Nedarbo socialinio draudimo išmoka 2. Darbo paieškos išmoka (2021)	1. Social benefit	1. Socialinė pašalpa	1. Reimbursement of part of housing rental (since 2015)	1. Būsto nuomos mokesčio dalies kompensacija (since 2015)	1. Child benefit 2. Children's maintenance benefit	1. Išmoka vaikui 2. Vaikų išlaikymo išmokos	N/A	…	1. Personal income tax (Gyventojų pajamų mokestis)	1. Pension social insurance 2. Health insurance
Luxembourg	1. Unemployment indemnity	1. Indemnité de chômage	1. Guaranteed minimum income	1. REVenu d’Inclusion Sociale, REVIS	1. Housing benefit	Subvention de loyer	1. Family benefit 2. School expenses allowance	1.Allocation pour l’avenir des enfants 2. Allocation de rentrée scolaire	N/A	…	1. Personal income tax (Impôt sur le revenu des personnes physiques) 2. Solidarity surtax (Impôt de solidarité)	1. Pension and disability insurance 2. Health insurance, including: • payment in kind • sickness insurance 3. Long term care insurance Non-tax compulsory payment: 4. Chamber of Employees (Chambre des salaries) Unemployment Benefit recipients pay health, long term care and pension contributions. Social Assisance benefit recipients pay health insurance contributions at a reduced rate
Malta	1. Unemployment benefit 2. Special unemployment benefit	1. Beneficcju tal- qaghad 2. Beneficcju specjali tal- qaghad	1. Social assistance 2. Supplementary allowance 3. Additional Bonus 4. Half yearly bonus	1. Ghajnuna Socjali 2. Allowance Supplimentari 3. Additional Bonus 4. Half yearly bonus	1. Housing benefit 2. Rent element	1. Beneficcju tad-Djar 2. Rent element	1. Children’s allowance	1. Allowance tat-Tfal	1. In-Work Benefit	1. Beneficcju ta’ Waqt l-Impjieg	1. Personal Income Tax	1. Sickness 2. Unemployment 3. Pension
Netherlands	1. Unemployment insurance 2. Unemployment assistance	1. Werkloosheidswet; Toeslagenwet 2. Inkomensvoorziening Oudere Werklozen	1. Social assistance	1. Participatiewet	1. Housing benefit	1. Huurtoeslag	1. Child benefit according to General Child Benefit Act 2. Targeted additional child benefit	1. Algemene Kinderbijslagwet, AKW 2. Wet op het kindgebonden budget, WKB	NA	…	1. Personal Income Tax	1. Unemployment 2. Old age public pension (first pillar) 3. Widows and orphans pension 4. Exceptional medical expenses and disability (long-term care) Non tax compulsory payments: 1. Health contribution 2. Old age private pension (second pillar) Unemployment benefit recipients pay all social contributions
New Zealand	1. Jobseeker Support	1. Jobseeker Support	When modelling a family claiming minimum-income benefits, Jobseeker Support is classified as social assistance (SA) since this is the principal minimum-income benefit for non-disabled working age people in New Zealand	…	1. Accommodation Supplement 2. Winter Energy Payment (since 2019)	1. Accommodation Supplement 2. Winter Energy Payment (since 2019)	1. Family tax credit	1. Family tax credit	1. In-Work Tax Credit 2. Minimum Family Tax Credit	1. In-Work Tax Credit 2. Minimum Family Tax Credit	1. Personal Income Tax	None Non-tax compulsory payment: 1. Accident compensation scheme administered by the Accident Compensation Corporation (ACC)
Norway	1. Unemployment benefit under the National Insurance Scheme	1. Dagpenger under arbeidsløshet	1. Social Economic Assistance A supplement to Social Economic Assistance (SA) that covers housing costs is included in Housing Benefits (HB).	1. økonomisk stønad	1. Housing benefit - rules for Oslo modelled A supplement to Social Economic Assistance (SA) that covers housing costs is also included in Housing Benefits (HB) - rules for Trondheim modelled.	1. bostøtte	1. Child benefit (including lone-parent supplements) 2. Transitional benefit for lone parents 3. Advance payments of child maintenance for lone parents 4. Cash benefit for families with small children	1. Barnetrygd 2. Overgangsstønad 3. Bidragsforskott 4. Kontantstøtte	N/A	…	1. Central government income tax 2. Local government income tax (general rate for al regions)	1. National Insurance Scheme Unemployment benefit recipients pay social contributions
Poland	1. Unemployment benefit	1. Zasiłek dla bezrobotnych	1. Temporary benefit	1. Zasiłek okresowy	1. Housing benefit	1. Dodatki mieszkaniowe	1. Family allowance, including: • Basic family allowance • Allowance for single parents • Allowance for raising a child in a large family • Allowance at beginning of the school year 2. Family 500 Plus Programme (since 2016) 3. Benefit “Good start” (since 2019) 4. Family care capital (since 2022)	1. Zasiłek rodzinny 2. Program Rodzina 500 Plus, świadczenie wychowawcze (since 2016) 3. Program “Dobry start” (since 2019) 4. Rodzinny kapitał opiekuńczy (since 2022)	N/A	…	1. Personal income tax (podatek dochodowy)	1. Retirement 2. Disability and survivor 3. Sickness 4. Health Part of the retirement contribution is a non-tax compulsory payment
Portugal	1. Unemployment insurance 2. Unemployment Social Allowance	1. Subsídio de desemprego 2. Subsídio Social de Desemprego	1. Social Insertion Income	1. Rendimento Social de Inserção	N/A	…	1. Family benefit	1. Abono de Família para Crianças e Jovens	N/A	…	1. Personal income tax 2. Surtax	1. Social security contributions
Romania	1. Unemployment indemnity	1. Indemnizatia de somaj	1. Guaranteed minimum income	1. Schema privind venitul minim garantat: ajutorul social pentru asigurarea venitului minim garantat	N/A	N/A	1. Monthly state allowance for children 2. Allowance for family support	1. Alocaţia lunară de stat pentru copii 2. Alocaţia pentru susţinerea familiei	N/A	N/A	1. Personal income tax	1. Health care schemes 2. Social-security schemes
Slovak Republic	1. Unemployment benefit	1. Poistenie v nezamestnanosti	1. Benefit in material need 2. Protection allowance 3. Activation allowance 4. Allowance for dependent child	1. Dávka v hmotnej núdzi 2. Ochranný príspevok 3. Aktivačný príspevok 4. Príspevok na nezaopatrené dieťa	1. Housing allowance	1. Príspevok na bývanie	1. Child allowance 2. Alimony replacement benefit 3. Parental allowance	1. Prídavok na dieťa 2. Náhradné výživné 3. Rodičovský príspevok	1. Special allowance 2. Child tax credit 3. Employee tax credit	1. Osobitný príspevok 2. … 3. …	1. Personal income tax	1. Health Insurance 2. Social Insurance, including • Sickness • Retirement • Disability • Unemployment
Slovenia	1. Unemployment insurance	1. Zavarovanje za primer brezposelnosti	1. Financial social assistance	1. Denarna socialna pomoč	1. Housing benefit	1. Subvencija najemnine	1. Child benefit 2. Large family allowance	1. Družinski prejemek 2. Dodatek za veliko družino	N/A	N/A	1. Personal income tax (National)	1. Pension and disability insurance 2. Health insurance 3. Unemployment insurance 4. Maternity leave insurance
Spain	1. Unemployment insurance benefit 2.Unemployment assistance benefit 3. Active Integration Income 4. Professional requalification programme (until 2018) 5. Employment activation programme (until 2018) 6. Extraordinary unemployment allowance (since 2019)	1. Prestación por desempleo 2. Prestaciones por desempleo de nivel asistencial 3. Renta Activa de Inserción 4. Programa de activación para el empleo, PAE (until 2018) 5. Programa de recualificación professional (until 2018) 6. Subsidio extraordinario por desempleo (since 2019)	1. Minimum income scheme - rules for Madrid, Andalucia, Catalonia and Galicia modelled 2. National Minimum Income Scheme	1. Ingreso Mínimo/Renta Mínima de Inserción 2. Ingreso Mínimo Vital	N/A	…	1. Childhood Support Aid, since February 2022	1. Ayuda para la Infancia	N/A	…	1. Personal income tax (Impuesto sobre la renta de las personas físicas, IRFP): • national and • regional - Madrid modelled	1. Pensions/sickness and invalidity 2. Unemployment 3. Training Unemployment Benefit recipients pay a reduced contribution rate
Sweden	1. Income-loss insurance 2. Unemployment assistance	1. Inkomstbortfallsförsäkring 2. Grundförsäkring	1. Social Assistance A supplement to social assistance (SA) that covers housing costs is included in Housing Benefits (HB)	1. Ekonomiskt bistånd	1. Housing benefit A supplement to social assistance (SA) that covers housing costs is also included in Housing Benefits (HB).	1. Bostadsbidrag	1. Child allowance 2. Alimony advance payment	1. Barnbidrag 2. Underhållsstöd	Earned Income Tax Credit (EITC)	jobbskatteavdraget	1. Central government personal income tax (Inkomstskatt) 2. Local government personal income tax - average rate modelled	1. General pension contribution Unemployment benefits pay social contributions
Switzerland	1. Unemployment insurance	1. Assurance chômage / Arbeitslosenversicherung	1. Guaranteed minimum income - rules for Zurich modelled A supplement to guaranteed minimum income that covers housing costs is included in Housing Benefits (HB)	1. Aide sociale / Sozialhilfe / Assistenza sociale	A supplement to guaranteed minimum income that covers housing costs is included in Housing Benefits (HB) - rules for Zurich modelled	Frais de logement / Wohnkosten	1. Family benefit	1. Familienzulagen, Allocation familiales	N/A	…	1. Federal income tax (Impôt sur le revenu perçu par l'administration fédérale) 2. Taxes levied by decentralised authorities - canton and commune of Zurich modelled	1. Retirement pensions 2. Unemployment Non-tax compulsory payments: 1. Second pillar of pension system 2. Health Unemployment insurance benefit recipients pay social contributions
Turkey	1. Unemployment benefit under Unemployment Insurance Law	1. İşsizlik Sigortası Kapsamında İşsizlik Ödeneği	N/A.	…	N/A	N/A	N/A	N/A	N/A	N/A	1. Personal income tax 2. Stamp tax	1. Invalidity, Old-age and Survivors Insurance 2. Universal Health Insurance 3. Unemployment Insurance
United Kingdom	1. Jobseeker’s Allowance (Contribution-based) 2. Jobseeker’s Allowance (Income-based) (until 2018) 3. New-Style Jobseeker’s Allowance (Contribution-based) (from 2019) 4. Universal Credit (since 2019), the standard rates are attributed to UB when the individual is assumed to be relying on Unemployment benefits	1. Jobseeker’s Allowance (Contribution-based) 2. Jobseeker’s Allowance (Income-based) (until 2018) 3. New-Style Jobseeker’s Allowance (Contribution-based) (from 2019) 4. Universal Credit (since 2019), the standard rates are attributed to UB when the individual is assumed to be relying on Unemployment benefits	1. Income support (until 2018) 2. Universal Credit (since 2019) standard allowances are attributed to the variable SA, the housing component to HB and the childcare element to cc_benefit. All components are in UC	1. Income support (until 2018) 2. Universal Credit (since 2019) standard allowances are attributed to the variable SA, the housing component to HB and the childcare element to cc_benefit. All components are in UC	1. Housing benefit (until 2018) - rates for Maidstone modelled 2. Universal credit (since 2019) - rates for Maidstone modelled, in variables HB and UC	1. Housing benefit (until 2018) - rates for Maidstone modelled 2. Universal credit (since 2019) - rates for Maidstone modelled, in variables HB and UC	1. Child benefit 2. Child Tax Credit (until 2018)	1. Child benefit 2. Child Tax Credit (until 2018)	1. Working Tax Credit (until 2018)	1. Working Tax Credit (until 2018)	1. Income tax	1. National Insurance Contributions
United States of America	1. Unemployment insurance - rules for Michigan modelled 2. Pandemic Emergency Unemployment Compensation (2021 only) 3. Federal Pandemic Unemployment Compensation (2021 only) 4. Pandemic Unemployment Assistance (2021 only)	1. Unemployment insurance 2. Pandemic Emergency Unemployment Compensation (2021 only) 3. Federal Pandemic Unemployment Compensation (2021 only) 4. Pandemic Unemployment Assistance (2021 only)	1. Supplemental Nutrition Assistance Program	1. Supplemental Nutrition Assistance Program	N/A	…	1.Temporary Assistance for Needy Families - rules for Michigan modelled, where it is called Family Independence Program	1. Temporary Assistance for Needy Families / Family Independence Program	1. Earned Income Tax Credit 2. Local (Michigan) Earned Income Tax Credit	1. Earned Income Tax Credit 2. Michigan Earned Income Tax Credit	1. Federal income tax 2. Local income taxes - rules for Michigan modelled	1. Old age, survivors, and disability insurance 2. Old age hospital insurance
	Notes: The years in brackets refer to the policy years in which a benefit or a tax is included in the model. "Until year X" means that Year X is the last year for which the policy is simulated. "Since Year X" means that Year X is the first year for which the policy is simulated. If the years are not specified, the information refers to 2018-2022. Years outside the scope of the TaxBEN model are no…
	Source: OECD Benefits and Wages (https://www.oecd.org/social/benefits-and-wages/)
