# Supplementary material
Source: Research Square preprint supplement (doi:10.21203/rs.3.rs-9001774/v1)
Supplement: Supplementary file 2 [file f6f6794b403aaa329597efd9.xlsx]

## Sheet: Sheet1
Country	Year	Leave	GDP	Unemployment	Childcare spending	Family policy spending	Fertility	Fourth births	Third births	Second births	First births	Adjusted fertility	Benefit size_1st ch	Benefit size_2nd ch	Benefit size_3rd ch	Benefit size_4th ch	Total Benefit Size	Weighted Total Benefit Size	Child age_92
Austria	2002		44720.7		0.27		1.39	389	1456	4765	7376	1.681	6.66225	6.73853	6.77083	6.34146	26.5131	33.183	0
Austria	2003		44940.9		0.28	3.02987	1.38	363	1436	4695	7321	1.587	12.5057	6.36201	6.40341	6.01805	31.2891	40.4675	-14.3483
Austria	2004		45880.7		0.28		1.42	421	1506	4855	7407	1.638	12.2248	6.23467	6.28277	5.91137	30.6536	39.6358	-14.0729
Austria	2005	138	46591.9	6.03	0.28	2.93149	1.41	405	1487	4834	7379	1.728	11.8605	6.06861	7.28178	6.78753	31.9985	40.9314	-13.5929
Austria	2006		47952.4	5.64	0.29		1.41	406	1473	4714	7399	1.687	6.13494	6.22274	7.45589	6.93856	26.7521	33.1189	0.575221
Austria	2007		49576.5	5.22	0.29	2.68951	1.38	385	1436	4866	7299	1.613	5.98362	6.07792	6.13387	5.77937	23.9748	29.986	0.56777
Austria	2008		50141.2	4.44	0.31		1.42	398	1504	4819	7381	1.704	10.8973	5.65991	7.48116	8.34459	32.383	40.8453	-12.4237
Austria	2009		48138.2	5.67	0.38	2.96314	1.39	375	1459	4997	7333	1.71	10.9875	5.88443	6.27941	6.31224	29.4636	37.774	-12.0728
Austria	2010	60	48907.7	5.19	0.45	2.99334	1.44	394	1531	4983	7480	1.789	10.7925	5.80267	6.19695	6.23418	29.0263	37.2028	-11.85
Austria	2011	60	50172.4	4.9	0.45	2.73506	1.43	371	1473	5052	7508	1.778	10.3605	5.78898	6.62708	6.6103	29.3869	37.4349	-9.87092
Austria	2012	60	50287.3	5.19	0.47	2.68487	1.44	361	1479	5066	7535	1.712	9.70734	5.74126	6.58201	6.50639	28.537	36.2541	-8.75197
Austria	2013	60	49998	5.72	0.49	2.69754	1.44		1446	5157	7522	1.628	9.01886	5.64132	6.47432	6.46526	27.5998	34.9472	-7.35924
Austria	2014	60	49935.7	6.03	0.51	2.65746	1.46	367	1510	5260	7570	1.68	8.73367	5.72418	6.55732	6.54796	27.5631	34.8228	-6.4531
Austria	2015	60	49942.1	6.15	0.52	2.69625	1.49	381	1526	5323	7691	1.648	8.24899	5.67528	5.97476	6.02962	25.9286	32.8429	-5.46774
Austria	2016	60	50292.9	6.45	0.54	2.68414	1.53	443	1628	5297	7711	1.622	7.80281	5.66507	5.94929	5.98993	25.4071	32.1056	-4.42652
Austria	2017	60	51105.6	5.92	0.53	2.63998	1.52	437	1597	5103	7699	1.706	7.33601	5.59042	5.87506	5.91933	24.7208	31.1636	-3.49955
Austria	2018	60	52092.6	5.21	0.53	2.57604	1.47	403	1519	5050	7591	1.718	5.5792	5.65589	5.94247	5.97845	23.156	28.8202	0.98222
Austria	2019	60	52610.5	4.84	0.55	2.54062	1.46	396	1487		7582		9.31593	8.017	7.96354	6.53667	31.8331	40.34	-1.40368
Austria	2020	60	48904.9	6.03			1.44						8.88581	7.85402	7.81343	6.05685	30.6101	38.8132	-0.870042
Austria	2021	60	50779.9	6.2			1.48						8.29534	7.73269	7.70139	6.4879	30.2173	38.1164	0.152931
Belgium	2002		41001.4		0.6		1.65						4.64164	7.96018	12.6078	11.0502	36.2598	43.4339	1.75866
Belgium	2003		41254.1		0.62	3.09402	1.67						4.59849	7.92184	12.3227	10.8789	35.722	42.8168	1.75174
Belgium	2004		42542.9		0.61		1.72						4.36521	7.68436	12.0751	10.3251	34.4498	41.2893	1.66612
Belgium	2005	28	43291.7	8.43	0.61	2.99715	1.76						4.42579	7.78044	12.2035	10.491	34.9008	41.828	1.68348
Belgium	2006		44104.6	8.25	0.61		1.8						4.36501	7.69093	12.0755	10.4158	34.5472	41.3945	1.66192
Belgium	2007		45391.9	7.48	0.61	3.03061	1.82						4.43187	7.71255	12.0206	10.4344	34.5995	41.4795	1.96554
Belgium	2008		45235.9	6.97	0.64		1.85						5.65629	8.80018	12.6503	11.244	38.3508	46.3056	-6.13335
Belgium	2009		43966.7	7.99	0.65	3.30026	1.84						5.59625	8.71435	12.6044	11.1479	38.0629	45.9484	-6.05115
Belgium	2010	28	44814.7	8.38	0.68	3.27509	1.86						5.487	8.55304	12.3516	11.074	37.4656	45.208	-5.90521
Belgium	2011	28	44984.9	7.22	0.68	3.30945	1.81						5.67492	8.76154	12.5676	11.3773	38.3814	46.329	-6.74634
Belgium	2012	32.3	45037.5	7.63	0.74	3.25036	1.8						5.58985	8.67365	12.4628	11.2896	38.016	45.8751	-6.547
Belgium	2013	32.3	45031.5	8.55	0.77	3.31232	1.76						5.5905	8.68035	12.3563	11.1807	37.8078	45.6497	-6.51105
Belgium	2014	32.3	45539.5	8.66	0.82	3.27642	1.74						6.84126	11.2281	17.0798	11.7584	46.9075	56.8453	-5.38833
Belgium	2015	32.3	46200.9	8.65	0.8	3.18858	1.7						5.34613	8.33602	12.0866	10.9523	36.7211	44.282	-6.26249
Belgium	2016	32.3	46549.9	7.85	0.82	3.14548	1.68						5.22228	8.03376	11.8599	10.5926	35.7085	43.0563	-6.0147
Belgium	2017	32.3	47121.7	7.1	0.8	3.16371	1.65						5.1672	7.96876	11.7992	10.5269	35.4621	42.7501	-5.85118
Belgium	2018	32.3	47748.7	5.96	0.81	3.13138	1.62						4.8788	7.46425	10.9374	9.89014	33.1706	40.0026	-4.83155
Belgium	2019	32.3	48555.6	5.37	0.81	3.1761	1.6						4.88181	7.43449	10.5915	10.2763	33.1841	39.9869	-4.91092
Belgium	2020	32.3	45780.9	5.54			1.55						5.93405	6.59323	10.243	10.271	33.0413	39.993	-5.21518
Belgium	2021	32.3	48716.9	6.28			1.6						5.92247	6.61256	10.2859	10.2042	33.0251	39.9796	-5.21317
Czechia	2002		24631		0.31		1.17	148	771	4429	7713	1.632	5.35593	6.88964	11.6494	10.298	34.1929	41.1582	2.11895
Czechia	2003		25511.5		0.31		1.18	154	777	4440	7690	1.697	4.15734	6.78962	10.4943	10.0059	31.4471	37.6605	1.7951
Czechia	2004		26725.8		0.3		1.23	175	832	4604	7894	1.773	10.3436	5.12564	8.31723	7.86487	31.6514	39.746	-13.7903
Czechia	2005	214	28414.5	7.94	0.31		1.29	189	914	4992	7972	1.801	11.2212	5.82076	8.10847	7.7836	32.934	41.6473	-13.9911
Czechia	2006		30241.1	7.13	0.31		1.34	211	980	5365	8112	1.752	10.9765	5.39275	5.25648	8.00429	29.63	37.7369	-13.4127
Czechia	2007		31752.3	5.33	0.3		1.45	288	1230	5695	8207	1.833	6.7415	3.30251	4.97194	7.41407	22.43	27.7736	-10.0521
Czechia	2008		32270.8	4.41	0.32		1.51	299	1329	5678	8365	1.811	5.65518	2.10709	6.55594	5.36265	19.6809	24.1779	-8.40022
Czechia	2009		30586.6	6.68	0.39		1.51	308	1304	5681	8321	1.718	5.42817	1.72048	6.51169	4.73275	18.3931	22.6064	-8.25174
Czechia	2010	110	31254.7	7.29	0.39		1.51	312	1316	5386	8221	1.779	5.56072	1.66639	4.73518	5.91101	17.8733	21.9777	-9.73076
Czechia	2011	110	31867.2	6.72	0.39		1.43	246	1121	5467	8026	1.636	7.01419	2.38767	3.93842	2.91005	16.2503	21.0005	-11.3109
Czechia	2012	110	31579.1	6.97	0.43		1.45	259	1162	5422	8072	1.621	8.299	1.20077	5.29312	2.94463	17.7375	22.8386	-17.3048
Czechia	2013	110	31560.3	6.97	0.45		1.46		1197	5649	8083	1.595	8.28162	1.19845	5.283	2.96015	17.7232	22.815	-17.2609
Czechia	2014	110	32231.1	6.12	0.46		1.53	351	1364	5814	8130	1.657	8.04389	1.16661	3.2858	4.5406	17.0369	21.8527	-18.5399
Czechia	2015	110	33909.3	5.06	0.43		1.57	358	1436	6035	8226	1.677	7.80403	1.73373	4.06087	5.04963	18.6483	23.6789	-17.8075
Czechia	2016	110	34696.2	3.97	0.41		1.63	412	1562	6216	8342	1.711	7.45204	1.94807	2.75572	5.23985	17.3957	22.1867	-18.998
Czechia	2017	110	36406	2.91	0.44		1.69	452	1689	6300	8426	1.823	6.98819	4.73712	4.4282	4.24043	20.3939	26.0954	-13.4233
Czechia	2018	63.4	37447.8	2.27	0.46		1.71	461	1727	6335	8454	1.867	6.93224	2.21991	3.16052	6.25878	18.5714	23.3286	-16.5124
Czechia	2019	62.3	38427.3	2.02	0.48		1.71	441	1753	6360	8471	1.84	6.49755	2.0892	2.97823	5.90824	17.4732	21.9396	-15.5297
Czechia	2020	74.5	36208	2.55			1.71	435	1763	6578	8488	1.947	8.141	2.00034	2.85405	5.66872	18.6641	23.8304	-20.32
Czechia	2021	73.8	37504.4	2.81			1.83	444	1853		8578		7.15005	2.13052	3.02256	5.56872	17.8719	22.64	-18.5007
Denmark	2002		45625.2		1.38		1.72	521	2172	6504	8171	2.071	4.00412	3.84996	3.70724	3.57471	15.136	19.0153	-3.27881
Denmark	2003		45684.2		1.39	3.67113	1.76	506	2286	6638	8284	1.999	4.01943	3.86412	3.72036	4.86475	16.4687	20.439	-3.26277
Denmark	2004		46790.3		1.33		1.78	545	2351	6712	8323	1.949	3.95433	3.80391	3.66452	5.17323	16.596	20.5267	-3.24178
Denmark	2005	50	47742.3	4.84	1.32	3.49965	1.8	551	2387	6937	8322	1.959	4.02072	3.86531	3.72146	5.63855	17.246	21.264	-3.28854
Denmark	2006		49446.2	3.91	1.33		1.85	591	2487	6979	8436	2.067	3.93947	3.79016	3.65175	5.26484	16.6462	20.5691	-3.23176
Denmark	2007		49685.6	3.75	1.37	3.67468	1.84	571	2504	7093	8462	1.98	3.8412	3.69911	3.56716	4.87619	15.9837	19.7953	-3.15909
Denmark	2008		49134.2	3.68	1.36		1.89	618	2622	7005	8528	2	3.95486	3.8044	3.66497	4.5571	15.9813	19.8755	-4.5894
Denmark	2009		46469.7	6.41	1.44	4.05966	1.84	531	2448	7085	8517	2.042	3.87648	3.73182	3.59757	4.35871	15.5646	19.3767	-4.50823
Denmark	2010	50	47134.3	7.75	1.37	3.89288	1.87	544	2532	6795	8584	2.085	3.98413	3.83148	3.60504	4.83527	16.2559	20.1823	-4.51382
Denmark	2011	50	47567.1	7.76	1.52	3.92138	1.75	415	2191	6670	8412	1.892	3.88492	3.73964	3.52177	4.63406	15.7804	19.6062	-4.40983
Denmark	2012	50	47495.8	7.78	1.51	3.80414	1.73	416	2159	6506	8313	1.866	3.86107	3.71754	3.50206	4.77543	15.8561	19.6692	-4.3805
Denmark	2013	50	47751.2	7.38	1.47	3.7323	1.67		1995	6553	8245	1.848	3.85524	3.71213	3.49776	5.07275	16.1379	19.9637	-4.37015
Denmark	2014	50	48266.5	6.92	1.39	3.61855	1.69	386	2028	6594	8262	1.808	3.87555	3.73096	3.51679	5.10811	16.2314	20.0777	-4.3916
Denmark	2015	50	49058.1	6.27	1.32	3.51948	1.71	404	2087	6795	8285	1.803	3.84692	3.70442	3.514	5.04711	16.1125	19.9322	-4.38964
Denmark	2016	50	50235	5.98	1.29	3.47801	1.79	472	2288	6676	8458	1.913	3.84174	3.69961	3.50993	5.04561	16.0969	19.912	-4.39099
Denmark	2017	50	51330	5.82	1.27	3.39861	1.75	428	2187	6602	8412	1.984	3.79575	3.65694	3.4724	4.87695	15.802	19.5661	-4.3494
Denmark	2018	50	52089.2	5.15	1.26	3.37248	1.73	422	2129	6543	8347	1.995	3.7123	3.57942	3.41149	4.58852	15.2917	18.9651	-4.26668
Denmark	2019	50	52658.1	5.03	1.24	3.31337	1.7	363	2030	6439	8284	1.925	4.20774	4.59061	4.22837	4.05683	17.0836	21.4104	-4.05909
Denmark	2020	50	51266.8	5.63			1.68	350	1958	6560	8188	1.918	4.16141	4.67542	4.18705	4.01878	17.0427	21.3703	-4.02244
Denmark	2021	50	54551.2	5.1			1.72	399	2109		8198	1.922	4.09952	4.7944	4.12268	3.95944	16.976	21.305	-3.9585
Estonia	2002		19084.4		0.17		1.36	308	1212	4363	8225	1.914					0
Estonia	2003		20658.8		0.19		1.37	310	1199	4428	8117	1.693					0
Estonia	2004		22208.2		0.23		1.47	387	1488	4763	8254	1.913					0
Estonia	2005	166	24456.3	7.97	0.26		1.52	399	1597	5325	8213	1.982	3.64492	3.51674	9.14996	7.86418	24.1758	28.7098
Estonia	2006		27007.5	5.94	0.25		1.58	407	1761	5635	8274	1.869	3.01951	7.42523	7.82147	6.83234	25.0985	30.483	0
Estonia	2007		29223.2	4.6	0.26		1.69	521	2069	5819	8394	2.084	2.5295	6.0855	10.3876	9.41008	28.4127	33.5768	0
Estonia	2008		27816.7	5.52	0.37		1.72	542	2116	5739	8508	2.251	7.21718	5.34702	9.01786	8.27191	29.854	36.6905	-3.78404
Estonia	2009		23795.4	13.47	0.34	2.85033	1.7	576	2116	5760	8424	2.041	3.86973	5.75599	9.67005	8.8174	28.1132	33.6572	-4.04597
Estonia	2010	166	24420.9	16.58	0.34	2.81564	1.72	635	2211	5398	8272	1.985	3.81643	5.67962	9.54866	8.71636	27.7611	33.2325	-3.99733
Estonia	2011	166	26265.5	12.35	0.32	2.46459	1.61	576	1999	5306	7936	1.888	3.61392	6.78769	10.2761	9.31849	29.9962	35.8887	-9.5253
Estonia	2012	166	27205.5	9.91	0.34	2.25954	1.56	466	1859	5193	7856	1.705	3.43995	6.4718	9.82689	8.94762	28.6863	34.3093	-9.12
Estonia	2013	166	27706.8	8.49	0.29	2.12789	1.52		1818	5242	7718	1.647	3.20292	6.0397	10.9644	9.881	30.088	35.6483	-8.45154
Estonia	2014	166	28636.6	7.32	0.69	2.49915	1.54	435	1861	5468	7755	2.003	3.0439	5.7487	10.4648	9.47345	28.7309	34.0287	-8.08019
Estonia	2015	166	29222.7	6.39	0.75	2.9939	1.58	486	1896	5482	7970	2.292	5.10728	7.44914	11.2371	10.102	33.8955	40.8781	-7.20138
Estonia	2016	166	30085.3	6.83	0.77	3.09284	1.6	500	2032	5375	7976	1.984	4.91235	6.97938	10.0097	9.09894	31.0004	37.5147	-6.44853
Estonia	2017	166	31835.1	5.81	0.76	2.99485	1.59	516	2006	5428	7897	1.721	4.77503	6.79305	30.1499	7.49856	49.2166	58.0236	-5.73017
Estonia	2018	166	32951.4	5.39	0.8	3.25086	1.67	664	2336	5361	7722	1.825	4.48471	6.24246	26.4374	6.76828	43.9328	51.9048	-5.1039
Estonia	2019	166	34036.9	4.48	0.86	3.34294	1.66	679	2284		7941		4.4519	6.0657	24.4895	6.36771	41.3748	49.0023	-4.7684
Estonia	2020	82	33745.7	6.88			1.58						3.7144	5.41981	25.5247	6.80218	41.461	48.6765	0
Estonia	2021	82	36417.6	6.21			1.61						3.44601	5.04125	23.8274	6.4369	38.7515	45.4761	2.22045e-14
Finland	2002		39071.7		0.89		1.72	773	2477	5837	7564	1.929	6.35191	4.13049	4.1168	4.46321	19.0624	24.2314	-13.9734
Finland	2003		39759.8		0.89	2.81132	1.76	787	2552	6010	7699	1.929	6.09012	4.00855	3.98923	4.3345	18.4224	23.4038	-13.4968
Finland	2004		41226.9		0.88		1.8	886	2643	6094	7762	1.88	6.04396	3.7169	3.79933	4.12709	17.6873	22.5091	-12.6752
Finland	2005	159	42228.3	8.4	0.9	2.83447	1.8	857	2616	6222	7770	1.916	6.29326	3.58174	3.71172	4.01688	17.6036	22.476	-13.3356
Finland	2006		43760.5	7.72	0.88		1.84	896	2688	6167	7826	1.945	6.09994	3.31382	3.52502	3.81817	16.7569	21.4108	-12.84
Finland	2007		45884.4	6.87	0.87	2.71676	1.83	871	2647	6220	7802	1.935	5.77087	3.11984	3.37608	3.66173	15.9285	20.3341	-12.396
Finland	2008		46029.2	6.37	0.92		1.85	902	2677	6286	7829	1.939	5.5277	2.97698	3.21774	3.51862	15.241	19.4556	-11.8857
Finland	2009		42110.5	8.37	1.03	3.12331	1.86	908	2718	6299	7882	1.95	5.46794	2.85184	3.26463	3.54327	15.1277	19.2782	-11.972
Finland	2010	159	43253.6	8.54	1.03	3.10228	1.87	891	2711	6106	7893	2.021	5.28135	2.78496	3.22785	3.45804	14.7522	18.7832	-11.6363
Finland	2011	159	44150.6	7.97	1.05	3.0739	1.83	871	2589	6092	7782	1.984	5.19613	2.74345	3.20912	3.40834	14.557	18.5287	-11.5091
Finland	2012	159	43326.9	7.81	1.09	3.17341	1.8	818	2520	5879	7736	1.947	5.05297	2.74499	3.21175	3.41026	14.42	18.3263	-11.1137
Finland	2013	161	42738.9	8.3	1.11	3.19818	1.75		2413	5799	7595	1.846	5.03368	2.72508	3.13535	3.38146	14.2756	18.1548	-11.1
Finland	2014	161	42399.7	8.75	1.09	3.16379	1.71	721	2304	5654	7534	1.869	5.02545	2.73769	3.17942	3.39255	14.3351	18.2211	-11.1333
Finland	2015	161	42490.2	9.46	1.12	3.08582	1.65	618	2135	5408	7476	1.957	5.08298	2.79153	3.2292	3.37423	14.4779	18.4145	-11.1638
Finland	2016	161	43567.2	8.92	1.1	3.00327	1.57	562	1902	5026	7317	1.809	4.94857	2.72856	3.16942	3.30642	14.153	17.9937	-10.9166
Finland	2017	161	44852.7	8.77	1.06	2.86435	1.49	515	1763	4766	7055	1.64	5.0011	2.67221	3.12774	3.32186	14.1229	17.964	-11.1354
Finland	2018	161	45298.1	7.43	1.1	2.86997	1.41	439	1526	4588	6813	1.614	4.62496	2.39507	2.84598	3.05062	12.9166	16.435	-10.8078
Finland	2019	161	45808.1	6.74	1.13	2.88991	1.35	387	1412	4664	6732	1.543	4.52739	2.33507	2.76825	3.01143	12.6421	16.0823	-10.5757
Finland	2020	161	44655.7	7.72			1.37	408	1482	4989	6731	1.683	3.57018	2.28217	2.68964	3.07034	11.6123	14.5845	-7.9846
Finland	2021	161	45981.9	7.67			1.46	489	1673		6982	1.778	3.50093	2.23125	2.63118	3.00441	11.3678	14.2788	-7.85798
France	2002		38068.8		1.19		1.88						2.5738	6.70543	19.5201	11.1067	39.906	46.551	-8.51789
France	2003		38111.4		1.23	3.7078	1.89						2.59014	6.6051	25.9015	4.65312	39.7499	46.7778	-7.85581
France	2004		38902.3		1.27		1.92						2.67085	6.52716	18.995	10.2648	38.4579	44.9693	-7.67585
France	2005	42	39253.2	8.88	1.2	3.68419	1.94						4.90663	8.57273	14.0805	10.0827	37.6425	45.2797	-12.0939
France	2006		39935.2	8.85	1.06		2						4.49764	8.43777	13.8001	10.0703	36.8058	44.1707	-11.9199
France	2007		40652.4	8.02	1.09	3.55258	1.98						4.40211	8.40476	15.8769	7.85993	36.5437	43.9798	-11.658
France	2008		40529.3	7.43	1.11		2.01						4.35854	8.2876	14.959	8.74767	36.3528	43.6662	-10.1604
France	2009		39163.4	9.12	1.2	3.72946	2						4.73512	9.35261	12.2083	8.17268	34.4687	41.9509	-10.377
France	2010	42	39730.9	9.28	1.21	3.64051	2.03						4.35055	8.36892	13.2594	8.37168	34.3505	41.4536	-10.3199
France	2011	42	40403.9	9.22	1.21	3.67466	2.01						4.28026	8.41736	13.4798	7.83805	34.0155	41.0986	-10.185
France	2012	42	40332.2	9.76	1.24		2.01						6.41226	8.57034	12.9578	8.4203	36.3607	44.4541	-9.70635
France	2013	42	40355.6	10.3	1.31	3.72773	1.99						6.31001	8.68918	13.1106	8.79861	36.9084	45.0379	-9.84777
France	2014	42	40544.3	10.28	1.31	3.73673	2						7.09174	8.00764	9.71107	6.35903	31.1695	38.8511	-1.40073
France	2015	42	40829.9	10.35	1.32	3.70443	1.96						7.42457	6.28406	9.80855	6.23374	29.7509	36.988	-1.37722
France	2016	42	41122.8	10.07	1.31	3.61468	1.92						5.54141	6.19579	11.847	7.82108	31.4052	38.0896	-1.38478
France	2017	42	41885.8	9.43	1.32	3.59325	1.89						4.82042	5.80157	11.8502	7.76531	30.2375	36.4471	-1.36791
France	2018	42	42457	9.03	1.29	3.50906	1.87						3.74015	6.83577	11.6195	7.20277	29.3982	35.407	-0.68063
France	2019	42	43043.5	8.43	1.26	3.4396	1.86						4.71529	6.67149	10.7125	6.97138	29.0707	35.3462	0.243698
France	2020	42	39653.9	8.03	1.29		1.83						6.44356	5.05895	10.2644	8.44465	30.2115	36.7553	0.731628
France	2021	42	42061	7.88			1.83						4.95224	6.00431	10.3194	7.72338	28.9994	35.1471	1.04532
Germany	2002		40855.9		0.36		1.34						6.20283	5.82532	5.52516	6.14007	23.6934	29.6632	0
Germany	2003		40584.3		0.37	3.14056	1.34						6.11566	5.74721	5.41758	6.15038	23.4308	29.3201	0
Germany	2004		41108.1		0.37		1.36						5.87346	5.53347	5.23021	5.91803	22.5552	28.2202	0
Germany	2005	58	41469.5	11.28	0.37	2.91832	1.34						6.14978	5.4119	5.12237	5.83812	22.5222	28.2543	0
Germany	2006		43139.1	10.28	0.37		1.33						6.20451	5.4577	5.16377	5.87134	22.6973	28.4779	0
Germany	2007		44522.4	8.54	0.37	2.61833	1.37						6.02294	5.29724	5.01988	5.75353	22.0936	27.7089	0
Germany	2008		45076.6	7.42	0.37		1.38						5.89086	5.18203	4.9158	5.66209	21.6508	27.1462	0
Germany	2009		42658.5	7.22	0.44	2.99876	1.36						6.46132	5.692	5.55394	6.16242	23.8697	29.9175	0
Germany	2010	58	44551.7	6.58	0.47	3.06777	1.39					1.675	6.53997	5.87298	5.95616	5.84987	24.219	30.3981	0
Germany	2011	58	46305.6	5.52	0.48	2.97981	1.39					1.597	6.45724	5.80212	5.8818	5.80255	23.9437	30.0475	0
Germany	2012	58	46412.1	5.08	0.53	3.01314	1.41					1.594	6.2561	5.61906	5.56723	5.82394	23.2663	29.1749	0
Germany	2013	58	46488	4.95	0.59	3.06078	1.42					1.631	6.17434	5.59366	5.58373	5.74568	23.0974	28.9566	0
Germany	2014	58	47317.5	4.71	0.6	3.05021	1.47					1.598	6.03397	5.42952	5.33279	5.72107	22.5173	28.2213	0
Germany	2015	58	47609.6	4.37	0.62	3.09763	1.5					1.485	6.06426	5.45462	5.34937	5.72435	22.5926	28.3216	0
Germany	2016	58	48280	3.91	0.64	3.14213	1.6					1.647	5.99016	5.38535	5.25113	5.68985	22.3165	27.9726	0
Germany	2017	58	49389.3	3.57	0.68	3.1547	1.57						5.99152	5.39017	5.29161	5.63222	22.3055	27.9655	0
Germany	2018	58	49724.1	3.21	0.7	3.19574	1.57						5.84848	5.26358	5.13421	5.57088	21.8172	27.3433	0
Germany	2019	58	50145.8	2.98	0.75	3.24088	1.54						5.66901	5.10108	4.98301	5.42232	21.1754	26.5338	0
Germany	2020	58	48187.4	3.63			1.53						5.99372	5.39125	5.32897	5.51183	22.2258	27.8846	0
Germany	2021	58	49691	3.58			1.58						5.86964	5.29658	5.16797	5.46002	21.7942	27.3393	0
Greece	2002		29590.9				1.28						1.17453	1.75701	6.41864	9.06062	18.4108	20.9155	-4.26211
Greece	2003		31230.8				1.29						1.35268	1.70243	4.98432	8.57475	16.6142	18.9738	-4.02985
Greece	2004		32730.3				1.31						1.34872	1.79275	6.98674	7.72373	17.8519	20.4406	-3.58314
Greece	2005	17	32830	10.01			1.34						1.29595	1.7235	7.17221	7.41758	17.6092	20.1541	-3.44448
Greece	2006		34581.7	9.03			1.4						1.04852	1.44879	8.52988	7.0819	18.1091	20.5928	-3.39259
Greece	2007		35622.9	8.42			1.41						1.61699	1.99464	7.60317	7.89178	19.1066	21.9773	-3.8044
Greece	2008		35409.4	7.77			1.5						1.52202	1.89987	7.39577	7.86106	18.6787	21.4445	-3.7854
Greece	2009		33797.6	9.75	0.01	0.953864	1.5						1.38716	1.7548	7.53716	7.5864	18.2655	20.9193	-3.65518
Greece	2010	43	31904.7	12.96	0.03	0.978261	1.48						1.46157	1.8255	5.91654	8.28706	17.4907	20.0431	-3.97993
Greece	2011	43	28709	18.09	0.04	1.02145	1.4						1.2494	1.64107	5.60133	9.45063	17.9424	20.3625	-4.17325
Greece	2012	43	26819.2	24.81	0.32	1.17743	1.34						1.28565	1.68808	11.6777	9.18814	23.8396	27.0367	0
Greece	2013	43	26334.7	27.82	0.35	1.32865	1.29						1.19588	1.63189	4.62987	6.19991	13.6576	15.7331	0
Greece	2014	43	26636.9	26.65	0.36	1.377	1.3						0.945853	1.15723	3.73889	5.85043	11.6924	13.3538	0
Greece	2015	43	26760.3	24.98	0.34	1.28513	1.33						0.754513	0.748863	3.0661	5.85962	10.4291	11.7754	0
Greece	2016	43	26740.9	23.88	0.32	1.27093	1.38						1.03318	1.02261	5.97715	3.7297	11.7626	13.5698	0
Greece	2017	43	27086.5	21.84	0.31	1.65542	1.35						1.04827	1.0374	6.06268	3.78002	11.9284	13.7614	0
Greece	2018	43	27594.4	19.74	0.32	1.88351	1.35						1.94371	1.90665	6.99921	4.56627	15.4159	18.132	0
Greece	2019	43	28142.7	17.88	0.34	1.76771	1.34						1.90964	1.87386	6.88103	4.49414	15.1587	17.8285	0
Greece	2020	43	25575.6	17.62			1.39						1.91676	2.17123	20.3729	5.08906	29.55	34.0494	0
Greece	2021	43	27870.4	14.79			1.39						1.81873	2.06217	7.41801	5.42215	16.7211	19.5375	0
Hungary	2002		20706.4		0.61		1.3	383	1235	4182	7588	1.716	12.7058	9.54026	21.5637	0.001	43.8108	55.7282	-23.3967
Hungary	2003		21611.8		0.69	3.2085	1.27	363	1190	4039	7504	1.758	11.2672	8.02615	16.1578	0.001	35.4521	45.4978	-21.8499
Hungary	2004		22743.7		0.67		1.28	349	1174	4086	7576	1.803	12.5453	8.89121	17.074	0.001	38.5115	49.5662	-23.6708
Hungary	2005	160	23767.6	7.17	0.68	2.99323	1.31	374	1241	4262	7646	1.707	11.5411	8.45842	15.2711	0.001	35.2716	45.4845	-21.831
Hungary	2006		24744	7.46	0.66		1.34	408	1310	4190	7631	1.701	12.599	7.91193	20.8969	0.001	41.4088	52.6234	-18.0173
Hungary	2007		24851.1	7.39	0.62	3.2165	1.32	377	1261	4260	7560	1.552	13.307	8.17372	21.3532	0.001	42.8349	54.5261	-18.9042
Hungary	2008		25144.6	7.8	0.63		1.35	434	1333	4211	7569	1.574	12.5318	8.0221	21.2424	1.70145	43.4978	54.8651	-17.5087
Hungary	2009		23522	9.68	0.64	3.38584	1.32	389	1275	3938	7447	1.715	12.0039	7.85074	20.3655	1.6799	41.9	52.8521	-15.9957
Hungary	2010	160	23829	10.8	0.64	3.40446	1.25	322	1107	3898	7285	1.526	12.5733	7.4117	20.5571	1.5899	42.132	53.2126	-20.0434
Hungary	2011	160	24342.7	10.66	0.62	3.79303	1.23	358	1185	4156	7151	1.313	17.4295	27.4195	11.7823	0.001	56.6323	75.7719	-16.6628
Hungary	2012	160	24162.8	10.58	0.62	3.69417	1.34	452	1415	4143	7210	1.337	17.9764	34.8848	14.2903	0.001	67.1526	89.4717	-15.3722
Hungary	2013	160	24666.2	9.63	0.62	3.57948	1.35		1472	4374	7129	1.383	17.1673	33.5446	14.4851	0.519425	65.7163	87.2471	-15.0842
Hungary	2014	160	25779.5	7.46	0.69	3.56359	1.44	580	1691	4511	7216	1.557	16.3843	32.2301	0.001	3.85545	52.4709	71.5688	-14.5845
Hungary	2015	160	26798.9	6.52	0.71	3.38248	1.45	574	1753	4718	7260	1.52	15.6671	31.0104	0.001	3.43206	50.1106	68.4242	-14.4387
Hungary	2016	160	27469.6	4.88	0.72	3.38436	1.53	631	1929	4684	7328	1.563	14.5073	12.1123	38.2011	1.30261	66.1233	81.9328	-13.0963
Hungary	2017	160	28719.4	4.05	0.68	3.31444	1.54	609	1947	4681	7275	1.656	12.8645	12.7508	32.5297	4.44607	62.5911	77.3431	-11.8665
Hungary	2018	160	30297.8	3.52	0.66	3.21881	1.55	582	1905	4706	7217	1.587	11.3291	13.0388	27.5043	7.36457	59.2368	72.9257	-10.3863
Hungary	2019	160	31786	3.25	0.66	3.09075	1.55	574	1889	4889	7216	1.559	10.5026	16.3654	23.6265	7.09008	57.5846	71.5539	-14.5467
Hungary	2020	160	30409.6	4.14			1.59	703	2094		7332		9.5196	14.9668	21.8702	6.9578	53.3144	66.1116	-13.778
Hungary	2021	160	32699.4	4.04			1.59						8.83987	13.9849	20.6115	8.99704	52.4333	64.5371	-13.1667
Iceland	2002		40076.8		0.99		1.93						0.599751	3.48632	4.84136	6.1937	15.1211	17.5958	-2.5224
Iceland	2003		40695		1.07	2.94523	1.99						1.30288	1.72977	4.72954	6.16948	13.9317	16.1017	-2.52183
Iceland	2004		43375.4		1.07		2.04						1.11328	0.857295	4.13983	6.03528	12.1457	13.8408	-2.47375
Iceland	2005	26	45518.6	2.87	1.13	2.85653	2.05						0.613066	0.255518	2.16389	4.94868	7.98115	8.92184	-2.2933
Iceland	2006		47058.1	3.17	1.29		2.08						0.791865	0.48016	2.27872	3.98868	7.53942	8.59827	-2.59215
Iceland	2007		49873.1	2.46	1.44	3.32983	2.09						1.47723	0.281857	1.98057	3.6086	7.34826	8.59496	-2.76567
Iceland	2008		49698.3	3.21	1.48		2.15						1.54118	1.26113	2.0057	3.79461	8.60261	10.236	-2.6538
Iceland	2009		45918.3	7.87	1.58	3.64521	2.23						2.25242	2.19631	2.85554	4.91835	12.2226	14.6862	-2.8566
Iceland	2010	26	44785.9	8.27	1.53	3.52061	2.2						2.09671	2.00063	2.54834	4.42676	11.0724	13.3276	-2.7955
Iceland	2011	26	45469.5	7.88	1.52	3.27224	2.02						0.784932	1.96375	1.92593	3.15948	7.83408	9.31513	0
Iceland	2012	26	45709.6	6.72	1.72	3.35158	2.04						0.415277	1.61925	1.59345	2.95821	6.58618	7.72186	0
Iceland	2013	26	47332.9	5.78	1.72	3.42907	1.93						0.872118	1.94141	1.90444	2.98688	7.70485	9.2054	0
Iceland	2014	26	47602.3	5.42	1.82	3.51794	1.93						0.53166	1.65031	2.54542	3.70181	8.42919	9.79325	0
Iceland	2015	26	49203.3	4.61	1.74	3.28477	1.8						0.001	1.71572	1.99253	3.94863	7.65788	8.74483	0
Iceland	2016	26	51587.6	3.26	1.7	3.19433	1.74						0.001	1.13062	1.53463	3.17197	5.83822	6.61655	0
Iceland	2017	26	52499.4	3.33	1.8	3.2223	1.71						0.359163	2.54575	1.63132	2.90265	7.43888	8.87426	0
Iceland	2018	26	53614.2	3.08	1.83	3.31263	1.71						1.32336	2.98459	1.83036	3.01982	9.15813	11.2254	0
Iceland	2019	26	53415.6	3.9	1.7	3.34276	1.74						1.71928	3.26599	2.1092	3.02038	10.1149	12.4989	0
Iceland	2020	26	48763.5	6.21			1.72						0.427392	2.63313	2.03118	2.91578	8.00748	9.5558	0
Iceland	2021	32	50140.8	6.09			1.82						0.0535713	2.04309	1.78979	2.70013	6.58659	7.71221	0
Ireland	2002		50366.1		0.24		1.97	1287	3527	6598	7946	2.316	2.66458	2.59543	3.22346	3.1228	11.6063	14.3387	0
Ireland	2003		51038.6		0.26	2.65959	1.96	1211	3442	6607	7971	2.372	3.74759	3.61222	4.36618	4.18352	15.9095	19.7057	0
Ireland	2004		53560.6		0.28		1.93	1164	3331	6532	7933	2.438	3.73487	3.6004	4.36522	4.18264	15.8831	19.6691	0
Ireland	2005	18	55373.2	4.63	0.28	2.55513	1.86	1020	3165	6590	7875	2.271	3.8727	3.72832	4.5005	4.30668	16.4082	20.3271	0
Ireland	2006		56640	4.79	0.28		1.91	1069	3257	6870	8043	2.121	4.70226	4.49108	5.14422	4.89254	19.2301	23.9157	-4.98174
Ireland	2007		57880.5	5	0.3	2.80604	2.01	1193	3503	6972	8247	2.151	4.71758	4.50505	5.11435	4.86551	19.2025	23.8947	-4.72772
Ireland	2008		54106.5	6.79	0.36		2.06	1285	3616	7002	8340	2.187	4.73758	4.52329	5.14217	4.89068	19.2937	24.0066	-4.99099
Ireland	2009		50861.5	12.66	0.45	3.81089	2.06	1218	3568	6949	8405	2.193	4.48489	4.29238	4.96251	4.72789	18.4677	22.9505	-2.33015
Ireland	2010	26	51483.7	14.57	0.48	3.5368	2.05	1165	3505	6801	8412	2.208	3.72423	3.59052	4.32103	4.14205	15.7778	19.5475	0
Ireland	2011	26	51929.3	15.41	0.46	3.34003	2.03	1116	3430	6668	8346	2.158	3.64979	3.52127	4.05749	4.13277	15.3613	19.0388	0
Ireland	2012	26	51648.8	15.48	0.49	3.26977	1.98	1050	3283	6501	8250	2.146	3.59374	3.46907	3.54435	4.09376	14.7009	18.2677	0
Ireland	2013	26	51999.8	13.78	0.47	3.03798	1.93		3083	6394	8170	2.186	3.37523	3.26503	3.1618	3.30065	13.1027	16.4015	0
Ireland	2014	26	56196.5	11.88	0.43	2.73785	1.89	905	2952	6255	8177	2.077	3.35456	3.24568	3.14365	3.04784	12.7917	16.0567	0
Ireland	2015	26	69305.5	9.93	0.33	2.0536	1.85	860	2839	6188	8129	2.149	3.47113	3.35468	3.2458	3.14376	13.2154	16.591	0
Ireland	2016	26	69738.8	8.41	0.33	2.02476	1.81	773	2712	6017	8066	2.107	3.49126	3.37349	3.2634	3.16026	13.2884	16.6831	0
Ireland	2017	26	75386.5	6.73	0.34	1.90786	1.77	721	2556	6002	8074	1.933	3.45966	3.34397	3.23577	3.13435	13.1738	16.5385	0
Ireland	2018	26	80789.9	5.78	0.34	1.79985	1.75	710	2472	5890	8078	2.054	3.38794	3.27692	3.17294	3.07537	12.9132	16.2098	0
Ireland	2019	26	83921.4	4.97	0.33	1.69594	1.71	642	2385	5741	8038	2.005	3.23179	3.13061	3.03558	2.94615	12.3441	15.4924	0
Ireland	2020	28	88519.7	5.85			1.63	582	2214		7950		3.14325	3.04746	2.95734	2.87239	12.0204	15.0844	0
Ireland	2021	31	101131	6.27			1.72						3.07797	2.98606	2.89948	2.81778	11.7813	14.783	0
Italy	2002		40240.1		0.44		1.27						3.12377	4.39289	8.45097	16.0138	31.9814	36.9824	0
Italy	2003		40078.7		0.49		1.29						2.9462	4.15033	7.6216	15.4069	30.125	34.8188	0
Italy	2004		40347.7		0.5		1.34						3.3192	4.06734	7.47515	15.2628	30.1245	34.935	0
Italy	2005	47.7	40441	7.78	0.51		1.34					1.458	0.628997	1.83895	6.35149	15.8047	24.6241	27.3012	0.148077
Italy	2006		41000.7	6.87	0.55		1.37					1.467	0.696234	1.96062	6.22497	15.6153	24.4971	27.2207	0.0914571
Italy	2007		41358.1	6.15	0.53		1.4					1.453	4.70704	4.09784	8.0768	22.9869	39.8686	45.871	-0.604849
Italy	2008		40645.5	6.78	0.56		1.45					1.535	4.63381	3.84027	7.58177	15.538	31.5938	36.9634	-0.640262
Italy	2009		38276.5	7.88	0.55	1.94864	1.45					1.58	4.61428	3.7097	7.56975	16.362	32.2558	37.6185	-0.992257
Italy	2010	47.7	38760.5	8.54	0.53	1.78444	1.46					1.596	4.49515	3.61274	7.17555	15.579	30.8624	36.0398	-1.0362
Italy	2011	47.7	38899.8	8.51	0.51	1.79176	1.44					1.545	4.448	3.5726	7.11422	14.9536	30.0884	35.1847	-0.646807
Italy	2012	47.7	37637.1	10.88	0.54	1.84988	1.43					1.526	4.40322	3.53435	7.18399	14.7837	29.9052	34.966	-0.63888
Italy	2013	47.7	36870.5	12.37	0.55	1.97279	1.39					1.498	4.86802	4.09307	9.74188	18.6096	37.3126	43.3334	-3.25828
Italy	2014	47.7	36863.2	12.82	0.54	1.95074	1.37					1.503	4.56577	3.84933	7.40164	15.9567	31.7734	37.1173	-1.31441
Italy	2015	47.7	37206.3	12	0.56	1.92842	1.35					1.535	4.47495	4.22123	7.49971	20.2607	36.4565	42.159	-1.28922
Italy	2016	47.7	37759.3	11.75	0.53	1.88931	1.34					1.52	4.42253	3.73307	7.13352	15.2331	30.5222	35.6821	-1.31516
Italy	2017	47.7	38461.3	11.26	0.55	1.89062	1.32					1.477	5.44804	3.69285	7.0604	15.0978	31.2991	36.9024	-4.00471
Italy	2018	47.7	38898.5	10.6	0.55	1.88755	1.29					1.458	5.40987	3.66631	6.96055	15.1055	31.1422	36.7066	-4.02598
Italy	2019	47.7	39183.4	9.93	0.56	1.87041	1.27					1.4	5.37618	3.6435	6.95324	15.0903	31.0632	36.6022	-4.0454
Italy	2020	47.7	35841.1	9.3	0		1.24						4.32368	3.50349	6.7261	15.1356	29.6889	34.6659	-1.48797
Italy	2021	47.7	39021.5	9.56			1.25						4.28867	3.47737	6.7838	14.9627	29.5125	34.461	-1.47547
Latvia	2002		14214		0.09		1.26										0
Latvia	2003		15561.3		0.09		1.32										0
Latvia	2004		17037.2		0.09		1.29										0
Latvia	2005		19068	10.04	0.09		1.39						5.62705	5.93611	6.75291	6.8641	25.1802	31.1191	0
Latvia	2006		21544.1	7.03	0.09		1.46						4.89009	5.14859	5.82181	5.93873	21.7992	26.9494	0
Latvia	2007		23875.8	6.08	0.09		1.54						5.37484	5.58791	6.21508	6.28585	23.4637	29.062	0
Latvia	2008		23347.2	7.75	0.69		1.58						5.67276	5.75865	6.18341	6.17099	23.7858	29.571	0
Latvia	2009		20351.9	17.55	0.84	2.41074	1.46						6.07399	5.72618	5.41605	5.13778	22.354	28.1557	0
Latvia	2010		19859.5	19.48	0.75	2.13508	1.36						6.86414	6.42324	7.86273	10.9984	32.1485	39.2175	-6.90313
Latvia	2011		20751.2	16.21	0.76	1.78106	1.33						6.81585	6.38093	6.29368	10.3108	29.8013	36.5957	-4.58406
Latvia	2012		22487.5	15.04	0.73	1.6189	1.44						6.56224	6.15813	5.8009	9.91947	28.4408	34.9547	-3.42126
Latvia	2013		23176.5	11.86	0.78	1.81906	1.52						6.59425	6.18631	5.8259	7.18825	25.7947	32.1726	-2.13269
Latvia	2014	94	23837.2	10.84	0.83	1.95408	1.65						7.95002	7.36454	5.59761	1.72614	22.6383	29.7	-0.215526
Latvia	2015	94	24975.5	9.88	0.82	2.18896	1.7						7.0843	8.1418	8.94008	3.9652	28.1314	35.6165	0
Latvia	2016	94	25801.6	9.63	0.8	2.26131	1.74						6.94124	7.92135	8.49311	3.66559	27.0213	34.2891	0
Latvia	2017	94	26905.9	8.71	0.81	2.25881	1.69						6.4044	7.34558	8.07881	6.04123	27.87	34.7785	0
Latvia	2018	94	28196.2	7.4	0.77	2.25377	1.6						5.67748	6.56239	7.27492	5.23738	24.7522	30.9013	0
Latvia	2019	94	28555.4	6.32	0.8	2.26601	1.61						5.87139	7.61215	11.9917	8.02541	33.5006	40.8638	0
Latvia	2020	94	27730.7	8.09			1.55						5.81037	7.40405	10.5927	7.53727	31.3444	38.4024	0
Latvia	2021	94	29878	7.58			1.57						5.16423	6.62112	10.2175	6.81286	28.8158	35.2101	0
Lithuania	2002		15008.3		0.09		1.23	224	848	4123	7556	1.456					0
Lithuania	2003		16729.5		0.09		1.26	261	934	4194	7491	1.707					0
Lithuania	2004		18029.8		0.08		1.27	234	913	4287	7620	1.692					0		1.97487
Lithuania	2005		19743	8.32	0.67		1.29	258	966	4591	7477	1.63	6.37211	5.9904	10.3194	6.51828	29.2002	35.9282	-14.0565
Lithuania	2006		21547.9	5.79	0.66		1.33	219	985	4758	7671	1.806	3.96259	3.81156	10.7887	5.44471	24.0076	28.8516	-17.1421
Lithuania	2007		24227.4	4.26	0.61		1.36	253	1046	5136	7826	1.836	1.52663	1.50368	13.5119	4.81527	21.3575	24.5685	-6.45767
Lithuania	2008		25117.8	5.83	0.61		1.45	267	1186	5384	8021	2.056	3.70536	3.57297	10.3937	6.65231	24.3243	28.9888	-4.43844
Lithuania	2009		21629.5	13.8	0.84		1.5	289	1327	5373	8087	2.185	4.2693	5.70572	11.424	9.06623	30.4653	36.4109	-3.77366
Lithuania	2010		22452.6	17.84	0.79		1.5	301	1353	5553	7997	1.773	2.52615	4.14109	8.72489	9.54372	24.9359	29.2181	-5.91984
Lithuania	2011		24352.3	15.39	0.8		1.55	345	1477	5717	8072	1.685	2.44712	4.01463	8.46873	6.86761	21.7981	25.8069	-5.78896
Lithuania	2012		25629.8	13.41	0.57		1.6	380	1601	5791	8188	1.891	0.739488	4.01286	7.52789	3.96716	16.2474	19.1733	0.147364
Lithuania	2013		26809.7	11.8	0.59		1.59		1544	5967	8264	1.979	0.699028	1.38835	9.67667	3.77332	15.5374	17.7829	0.990493
Lithuania	2014	62	27997.6	10.72	0.63		1.63	370	1623	6304	8365	1.938	1.31057	1.29361	9.02479	3.54017	15.1691	17.5692	0.926648
Lithuania	2015	62	28834.5	9.13	0.67	1.63	1.7	412	1764	6281	8507	1.96	1.27698	1.26088	27.4383	3.7274	33.7036	38.3895	0.46019
Lithuania	2016	62	29938.8	7.9	0.74	1.93019	1.69	398	1765	6127	8521	2.003	2.32551	2.27266	2.22216	29.9057	36.7261	40.6703	0.543936
Lithuania	2017	62	31660.6	7.12	0.77	2.08453	1.63	355	1644	6174	8439	2.021	3.45464	3.33928	8.0239	18.4925	33.3103	38.1911	0
Lithuania	2018	62	33240.5	6.18	0.86	2.26955	1.63	335	1679	6121	8434	2.067	3.11029	3.01647	26.4498	4.21212	36.7887	42.8435	0.715722
Lithuania	2019	62	34883.7	6.28	0.88	2.46023	1.61	308	1591	5622	8546	1.908	4.62333	4.41902	32.1026	4.75953	45.9045	53.8901	0.806529
Lithuania	2020	62	34865.7	8.52			1.48	266	1388		8219		10.9338	4.10716	12.0185	5.79566	32.8552	41.2051	0.665184
Lithuania	2021	62	36878.9	7.13			1.34						5.31646	27.3562	11.7176	5.86153	50.2518	64.1044	0.649674
Luxembourg	2002		98353.5		0.38	3.3664	1.63						7.91863	9.27075	9.50451	8.2396	34.9335	43.527	1.99549
Luxembourg	2003		99677.4		0.38	3.73971	1.62						7.77166	9.12021	9.73723	8.09733	34.7264	43.2198	1.98798
Luxembourg	2004		102479		0.38	3.6573	1.66						7.79043	9.1442	10.0872	8.13773	35.1596	43.7162	0.976202
Luxembourg	2005	42	103403	4.65	0.39	3.56875	1.63						7.74673	9.10962	10.526	8.12012	35.5025	44.0806	1.97437
Luxembourg	2006		107950	4.58	0.39	3.34678	1.65						7.70733	9.07943	10.9316	8.16473	35.883	44.4857	1.97406
Luxembourg	2007		114805	4.17	0.36	3.12111	1.61						7.51095	8.86425	10.6936	8.59871	35.6675	44.1002	1.92948
Luxembourg	2008		112465	4.92	0.53	3.8647	1.61						7.24203	8.5705	10.3651	9.21271	35.3904	43.5915	1.86818
Luxembourg	2009		106858	5.12	0.39	3.87212	1.59						7.01236	8.31648	10.0815	8.98519	34.3955	42.3523	1.81886
Luxembourg	2010	42	108841	4.58	0.5	3.73395	1.63						6.89035	8.1811	9.92977	8.8622	33.8634	41.69	1.79246
Luxembourg	2011	42	107461	4.83	0.5	3.43266	1.52						6.84354	8.12908	9.87138	8.81477	33.6588	41.4353	1.78228
Luxembourg	2012	42	106752	5.07	0.62	3.42619	1.57						6.65573	7.91992	9.63602	8.62307	32.8347	40.4102	1.74124
Luxembourg	2013	42	107346	5.88	0.73	3.424	1.55						6.544	7.79513	9.49517	8.50796	32.3423	39.7978	1.71665
Luxembourg	2014	42	107596	6.05	0.7	3.31884	1.5						6.43615	7.67443	9.35863	8.39609	31.8653	39.2049	1.69279
Luxembourg	2015	42	107898	6.46	0.71	3.24024	1.47						6.3942	7.62742	9.30536	8.35236	31.6793	38.9738	1.68347
Luxembourg	2016	42	110414	6.33	0.75	3.14992	1.41						6.37257	7.60316	9.27786	8.32978	31.5834	38.8545	1.67866
Luxembourg	2017	42	109460	5.62	0.81	3.21996	1.39						6.20804	7.10968	8.64116	7.95048	29.9094	36.8292	1.31077
Luxembourg	2018	46	108642	5.5	0.85	3.30451	1.38						6.11166	7.96232	9.70102	7.1604	30.9354	38.1942	4.46231
Luxembourg	2019	46	109526	5.59	0.94	3.3633	1.34						6.01776	7.48462	9.94	7.07259	30.515	37.5877	4.40679
Luxembourg	2020	46	106881	6.69			1.36						5.75216	6.22375	10.5311	6.82118	29.3282	35.8954	4.24703
Luxembourg	2021	46	112765	5.42			1.38						5.66257	8.02543	8.69977	6.75051	29.1383	36.0615	4.1656
Netherlands	2002		45526.9		0.43	1.50591	1.73	537	2107	6375	8119	1.817	3.50059	2.34226	2.5755	2.66455	11.0829	14.0053	1.65283
Netherlands	2003		45384.1		0.45	2.10875	1.75	528	2132	6415	8167	1.882	3.29872	2.53886	2.47589	2.6653	10.9788	13.8641	0.998419
Netherlands	2004		46123		0.43	1.57184	1.72	503	2066	6348	8162	1.83	4.03852	2.5129	2.4512	2.64255	11.6452	14.8595	-28.147
Netherlands	2005	16	46959.3	6.96	0.43	2.24535	1.71	493	2022	6265	8110	1.771	4.17465	2.47013	2.41048	2.59969	11.655	14.9097	0.959206
Netherlands	2006		48507.3	6.08	0.52	1.75101	1.72	518	2047	6266	8102	1.786	4.11197	2.57813	2.51327	2.70767	11.911	15.1938	0.999829
Netherlands	2007		50226.8	5.31	0.67	2.01598	1.72	520	2062	6424	8111	1.807	4.24708	2.59968	2.53381	2.72009	12.1007	15.4569	1.011
Netherlands	2008		51117.1	4.76	0.77	1.4474	1.77	568	2203	6505	8203	1.883	4.14705	2.59056	2.52515	2.71101	11.9738	15.2789	1.00776
Netherlands	2009		48992.5	5.42	0.85	2.08119	1.79	570	2243	6522	8306	1.901	4.69497	2.49861	2.43764	2.6194	12.2506	15.7608	0.970053
Netherlands	2010	42	49396.3	6.07	0.83		1.79	563	2247	6443	8350	1.902	4.68952	2.48264	2.42244	2.86393	12.4585	15.9733	0.963951
Netherlands	2011	42	49928.2	6.05	0.82	1.96716	1.76	515	2120	6345	8316	1.834	4.64786	2.43984	2.38166	2.72536	12.1947	15.6619	0.947704
Netherlands	2012	42	49230.9	6.82	0.73		1.72	484	2021	6215	8252	1.813	5.03418	2.42042	2.36319	2.54612	12.3639	15.99	0.922963
Netherlands	2013	42	49023.4	8.19	0.67		1.68		1915	6304	8194	1.833	4.81705	2.10492	2.06152	2.01988	11.0034	14.3493	0.897306
Netherlands	2014	42	49541.4	8.35	0.62		1.71	489	1995	6104	8250	1.882	4.67054	2.03976	1.99898	1.95981	10.6691	13.9129	0.870397
Netherlands	2015	16	50288.4	7.89	0.59	1.75977	1.66	449	1891	6098	8140	1.817	4.64824	2.01871	2.00261	2.21917	10.8887	14.1309	0.861598
Netherlands	2016	16	51118.9	7	0.63	1.83291	1.66	474	1928	5937	8129	1.832	5.0609	1.98966	2.27978	2.37061	11.7009	15.1677	0.848057
Netherlands	2017	16	52296.8	5.88	0.66	1.84367	1.62	447	1837	5794	8026	1.772	5.07535	2.03404	2.43208	2.37434	11.9158	15.4241	0.852594
Netherlands	2018	16	53217.7	4.87	0.68	1.82542	1.59	438	1778	5774	7934	1.765	5.05377	1.98131	2.40366	2.35634	11.7951	15.2703	0.84441
Netherlands	2019	16	53905	4.43	0.73	1.86163	1.57	425	1755		7953		4.91121	2.07361	2.42344	2.42829	11.8366	15.2848	0.883787
Netherlands	2020	16	51522	4.85			1.54						4.83802	3.10046	2.77998	2.70479	13.4233	17.2582	0.858015
Netherlands	2021	16	54428.2	4.22			1.62						4.7701	2.89367	3.84842	3.7058	15.218	19.1427	0.83989
Norway	2002		56406.8		0.62	3.02384	1.75	532	2483	6579	8303	2.066	4.22777	4.05628	3.89816	3.7519	15.9341	20.0236	-5.36749
Norway	2003		56603		0.69	3.19268	1.8	559	2576	6727	8427	2.084	4.10791	3.94582	3.79603	3.6572	15.507	19.4839	-5.22708
Norway	2004		58529.2		0.75	2.96884	1.83	576	2634	6819	8534	1.991	7.28302	6.7886	6.35705	5.97708	26.4057	33.307	0.724798
Norway	2005	142	59697.8	4.53	0.76	2.90525	1.84	594	2624	7047	8525	1.971	3.08561	2.99325	2.90626	2.82418	11.8093	14.8183	0
Norway	2006		60668.6	3.6	0.83	2.69073	1.9	620	2738	7013	8653	2.041	2.93005	2.84664	2.76785	2.6933	11.2378	14.0984	0
Norway	2007		61800	2.72	0.93	2.85439	1.9	643	2766	7155	8638	1.998	2.76723	2.69271	2.62211	2.55511	10.6372	13.3419	0
Norway	2008		61329.4	2.93	0.98	2.72744	1.96	682	2885	7237	8773	2.085	5.61106	5.31295	5.04492	4.80263	20.7716	26.1478	-20.9932
Norway	2009		59379.7	3.46	1.19	3.30953	1.98	691	2922	7168	8784	2.179	5.44055	5.15983	4.90665	4.67716	20.1842	25.4031	-20.3934
Norway	2010	135.7	59112.6	3.96	1.21	3.26491	1.95	639	2815	6969	8774	2.21	5.25999	4.99714	4.75931	4.54309	19.5595	24.6114	-19.7559
Norway	2011	134.7	58993.9	3.57	1.22	3.22106	1.88	564	2637	6896	8659	2.124	5.07385	4.82884	4.60641	4.40356	18.9127	23.792	-19.096
Norway	2012	134.7	59800.5	3.48	1.21	3.16251	1.85	524	2543	6731	8615	2.125	4.91202	4.68204	4.47263	4.28115	18.3478	23.0768	-18.52
Norway	2013	87	59682.8	3.93	1.25	3.19871	1.78		2368	6673	8551	2.15	2.21681	2.16873	2.12269	2.07857	8.5868	10.7623	0
Norway	2014	87	60229.4	3.77	1.3	3.27701	1.75	442	2294	6564	8513	2.039	2.14832	2.10314	2.05982	2.01825	8.32954	10.4389	0
Norway	2015	91	60721.6	4.69	1.33	3.38967	1.72	435	2226	6532	8485	1.963	2.09129	2.04845	2.00733	1.96783	8.1149	10.1691	0
Norway	2016	91	60889.2	4.91	1.39	3.48221	1.71	401	2121	6196	8441	1.951	2.03195	1.99148	1.95259	1.9152	7.89122	9.88801	0
Norway	2017	91	61904.6	4.37	1.36	3.34877	1.62	367	1922	5977	8256	1.848	1.98418	1.94558	1.90845	1.87271	7.71092	9.66147	0
Norway	2018	91	62006.5	3.99	1.31	3.16491	1.56	331	1752	5899	8159	1.91	1.92042	1.88423	1.84938	1.8158	7.46983	9.35859	0
Norway	2019	86	62281.2	3.88	1.38	3.27684	1.53	296	1674	5697	8103	1.89	1.84656	1.81308	1.78079	1.74964	7.19007	9.00718	0
Norway	2020	86	61130.8	4.75			1.48	263	1582	5881	7960	1.649	1.96444	1.9266	1.89018	1.85512	7.63634	9.56776	0
Norway	2021	86	63173.3	4.46			1.55	331	1748		8010	1.698	1.93111	1.89452	1.8593	1.82536	7.51029	9.40941	0
Poland	2002		16215.8		0.21	1.1741	1.25	256	1051	4094	7003	1.602	0.001	4.37095	6.63187	1.98319	12.987	15.4653	0
Poland	2003		16799.3		0.24	1.12417	1.22	225	973	3982	6991	1.6	0.001	4.31072	6.45369	1.90173	12.6671	15.0972	0
Poland	2004		17643.3		0.28	1.2308	1.23	224	970	4016	7030	1.592	0.001	7.35851	3.99961	3.20666	14.5658	17.8341	0
Poland	2005	16	18271.1	17.93	0.28	1.20873	1.24	227	1006	4255	7106	1.529	0.001	7.33113	3.96441	2.32625	13.6228	16.8243	0.706872
Poland	2006		19406.1	13.97	0.29	1.18992	1.27	241	1045	4414	7144	1.473	0.001	7.26663	3.90794	1.94224	13.1178	16.2666	0.679543
Poland	2007		20785.2	9.61	0.28	1.19611	1.31	273	1133	4734	7204	1.474	2.72822	5.64251	11.8653	4.58161	24.8176	29.8137	1.41568
Poland	2008		21658.2	7.04	0.43	1.24654	1.39	316	1276	4800	7360	1.615	2.59963	5.43895	11.2326	4.30053	23.5717	28.3411	1.32411
Poland	2009		22059.2	8.13	0.47	1.76887	1.4	305	1279	4744	7437	1.691	2.35878	5.14012	5.34578	9.63488	22.4796	26.617	0.742946
Poland	2010	22	22686.5	9.98	0.48	1.74994	1.41	297	1238	4436	7348	1.588	2.25532	5.07454	6.33648	11.2023	24.8686	29.1531	0.910374
Poland	2011	22	23824.8	9.95	0.51	1.67442	1.33	258	1107	4472	7082	1.399	2.1563	5.2029	2.82082	14.6557	24.8357	28.887	0.870219
Poland	2012	24	24187.9	10.39	0.55	1.71754	1.33	268	1136	4269	7043	1.387	2.10648	5.37995	2.98724	14.2769	24.7505	28.8388	0.849375
Poland	2013	52	24415.4	10.61	0.59	1.78682	1.29		1051	4410	6863	1.397	3.05168	6.23514	3.6842	14.8188	27.7899	32.7347	0.976108
Poland	2014	52	25364.1	9.21	0.61	1.82624	1.32	256	1118	4442	6877	1.46	2.86069	6.05237	4.33635	0.001	13.2504	17.2353	0
Poland	2015	52	26495.8	7.68	0.58	1.92719	1.32	256	1133	4680	6880	1.419	2.75357	2.67978	10.0772	5.75653	21.2671	25.0849	0
Poland	2016	52	27298.2	6.28	0.6	2.93551	1.39	320	1297	4963	6974	1.431	2.65625	16.5485	36.6012	19.852	75.6579	88.446	1.16815
Poland	2017	52	28705.1	4.96	0.46	2.98234	1.48	427	1593		6966		2.47411	15.4411	30.9948	22.0029	70.913	82.6575	0.638017
Poland	2018	52	30418.8	3.88	0.5	2.84946	1.46						2.29398	14.3421	18.7416	26.9562	62.3338	72.3758	0.625075
Poland	2019	52	31794.8	3.31	0.58	3.34849	1.44						2.53796	13.794	16.1926	24.0647	56.5892	66.0602	1.5275
Poland	2020	52	31178.5	3.22			1.39						13.1505	11.6221	15.8991	11.4015	52.0732	64.9011	1.17884
Poland	2021	52	33508.5	3.38			1.33						12.7043	11.2722	13.7381	12.4945	50.2091	62.5034	0.969315
Portugal	2002		29379.9		0.31	1.307	1.46	237	1063	5142	8824	1.78	3.19476	3.09585	3.89579	3.74971	13.9361	17.2108	0
Portugal	2003		28997.4		0.38	1.58295	1.44	234	1020	4998	8861	1.685	3.26312	3.16001	3.97253	3.82075	14.2164	17.5591	0
Portugal	2004		29445.4		0.37	1.16391	1.4	234	992	4815	8764	1.587	3.43098	3.69426	3.38081	3.27025	13.7763	17.2767	-6.35155
Portugal	2005	17.1	29620.8	9.23	0.37	1.34878	1.41	221	998	4673	8816	1.661	3.41111	3.67353	3.36254	2.55722	13.0044	16.4432	0
Portugal	2006		30047.8	9.3	0.36	1.16317	1.37	201	917	4556	8767	1.552	2.92759	3.40253	3.53529	3.08319	12.9486	16.1219	0
Portugal	2007		30740.5	9.58	0.35	1.31163	1.35	206	895	4655	8696	1.475	3.30964	3.56666	3.26856	2.49013	12.635	15.9737	0
Portugal	2008		30794.3	9.24	0.35	1.2336	1.39	229	978	4458	8747	1.594	3.83272	6.68781	6.89108	4.24714	21.6588	26.8903	-11.46
Portugal	2009		29804.6	11.22	0.38	1.64026	1.34	193	877	4557	8703	1.572	3.97419	6.65107	6.65007	4.36001	21.6353	26.8961	-11.6063
Portugal	2010	30.1	30308.5	12.58	0.39	1.5789	1.39	225	968	4424	8736	1.764	3.86806	6.48912	6.55688	4.1588	21.0729	26.2041	-11.1502
Portugal	2011	30.1	29838.1	13.52	0.37	1.40309	1.35	186	868	4092	8696	1.706	4.02304	5.2167	5.63989	3.55089	18.4305	23.0371	-9.32916
Portugal	2012	30.1	28744	16.57	0.38	1.43383	1.28	162	770	3759	8582	1.591	1.64868	6.70952	6.17256	3.39728	17.928	22.0151	-9.01068
Portugal	2013	30.1	28635.4	17.18	0.41	1.46648	1.21		656	3875	8488	1.611	1.8323	7.16122	6.6254	4.01314	19.6321	24.0558	-10.1945
Portugal	2014	30.1	29018.2	14.65	0.42	1.45106	1.23	138	699	4214	8459	1.597	1.84964	7.22773	6.62659	4.04786	19.7518	24.2091	-10.1986
Portugal	2015	30.1	29660.8	13.03	0.38	1.5058	1.31	170	804	4417	8533	1.624	2.42988	7.86687	7.61006	4.76843	22.6752	27.7911	-9.7544
Portugal	2016	30.1	30355.4	11.47	0.37	1.71826	1.36	200	909	4481	8606	1.56	4.18801	9.47422	6.92615	3.21846	23.8068	30.1208	-8.76236
Portugal	2017	30.1	31496.6	9.22	0.38	1.6998	1.38	228	983	4621	8549	1.531	4.56529	9.87168	8.15906	3.71457	26.3106	33.1222	-13.2387
Portugal	2018	30.1	32446	7.17	0.35	1.6729	1.42	254	1071	4642	8544	1.589	4.62756	9.85122	9.04249	3.87317	27.3944	34.3476	-15.076
Portugal	2019	30.1	33308.4	6.67	0.34	1.68408	1.43	274	1118	4478	8550	1.698	4.63608	9.68748	9.50542	4.3292	28.1582	35.1432	-16.7524
Portugal	2020	30.1	30511.6	7.14			1.41	248	1055	4237	8652	1.756	4.96451	10.355	10.0187	5.0284	30.3666	37.8435	-21.1353
Portugal	2021	30.1	32270	6.71			1.38	226	974		8444		4.79424	10.1137	10.0508	5.42751	30.3863	37.7278	-20.2616
Slovakia	2002		17671.6		0.46		1.19	291	924	3863	6971	1.615	4.87594	4.03659	8.09053	4.70259	21.7056	26.6695	2.13621
Slovakia	2003		18641.1		0.47		1.2	306	941	3887	6985	1.622	7.2382	3.92316	3.3161	8.60342	23.0809	28.736	-5.15834
Slovakia	2004		19614		0.4		1.25	349	1020	4010	7209	1.696	8.05412	5.21821	4.95942	4.72508	22.9568	29.4157	-6.35155
Slovakia	2005	164	20894.8	16.38	0.39		1.27	364	1040	3988	7225	1.714	13.8224	15.1093	14.8416	13.3872	57.1605	71.507	-6.36538
Slovakia	2006		22653.4	13.47	0.38		1.25	360	1021	4050	7214	1.68	13.2945	15.2506	14.4044	8.90041	51.8499	65.6775	-6.09055
Slovakia	2007		25080.9	11.23	0.37		1.27	356	1059	4325	7270	1.689	11.4323	13.6019	14.7668	8.83432	48.6353	61.0651	-19.4973
Slovakia	2008		26433.6	9.57	0.38		1.34	408	1175	4652	7535	1.745	7.72138	14.6447	13.0548	7.94545	43.3663	54.1756	-18.337
Slovakia	2009		24936.6	12.08	0.42		1.44	478	1369	4570	7727	1.822	9.17921	13.2483	12.9403	8.02389	43.3918	54.3776	0
Slovakia	2010	164	26551.7	14.43	0.4		1.43	467	1330	4618	7816	1.905	8.95123	12.8365	12.9296	7.7547	42.472	53.1907	0
Slovakia	2011	170	27421.9	13.61	0.42		1.45	436	1297	4700	7986	1.763	8.89309	12.5696	12.84	7.6042	41.9069	52.485	-21.0239
Slovakia	2012	170	27741.7	13.9	0.44		1.34	453	1345	4707	7923	1.591	6.11698	11.8309	18.8754	12.9248	49.7481	59.856	-20.9098
Slovakia	2013	170	27882.4	14.13	0.47		1.34		1366	4762	7989	1.594	6.01353	11.6234	18.6899	12.7709	49.0978	59.0527	-21.5377
Slovakia	2014	170	28605.1	13.1	0.5		1.37	501	1428		8062		6.05302	11.3242	18.6399	12.5491	48.5663	58.4152	-21.1761
Slovakia	2015	170	30062.2	11.47	0.5		1.4						6.08268	11.0527	19.4821	15.1098	51.7273	61.7538	-20.4069
Slovakia	2016	164	30598.8	9.66	0.53		1.48						6.50145	10.4902	20.2242	14.2118	51.4277	61.4902	-19.8385
Slovakia	2017	164	31453.9	8.08	0.57		1.52						6.56713	10.2017	18.8938	14.836	50.4986	60.3617	-20.0413
Slovakia	2018	164	32675.8	6.51	0.59		1.54						6.65408	7.62324	17.8118	16.3107	48.3997	57.3538	-19.2145
Slovakia	2019	164	33452	5.72	0.65		1.57						6.72495	14.468	16.0747	11.3868	48.6545	59.5245	-18.5052
Slovakia	2020	164	32293.2	6.66			1.59						6.34644	13.0071	16.821	11.4632	47.6377	57.919	-26.7861
Slovakia	2021	164	33963.2	6.83			1.64						5.48084	9.92105	20.5329	12.154	48.0888	57.3946	-27.3173
Slovenia	2002		26189		0.57	1.99947	1.21	145	808	4329	7976	1.644					0
Slovenia	2003		26947.4		0.56	1.9585	1.2	138	815	4291	7757	1.477					0
Slovenia	2004		28108.1		0.53	1.93473	1.25	162	929	4411	7777	1.604					0
Slovenia	2005		29124	6.54	0.53	1.91095	1.26	168	946	4625	7807	1.604	7.95125	5.12807	4.87792	4.65105	22.6083	28.9733	-3.68578
Slovenia	2006		30689.7	5.99	0.5	1.87337	1.31	217	1057	4851	7800	1.592	8.11677	5.35771	5.08526	4.83917	23.3989	29.9582	-3.40976
Slovenia	2007		32652.7	4.86	0.47	1.70297	1.38	262	1206	5430	7851	1.634	12.7538	4.77192	4.55458	4.35618	26.4365	34.8424	-3.29255
Slovenia	2008		33746.9	4.39	0.46	1.74597	1.53	321	1455	5438	8200	1.71	11.975	4.54164	4.34434	4.16346	25.0244	32.9512	-3.32565
Slovenia	2009		30898.6	5.85	0.48	2.05217	1.53	356	1484	5617	8142	1.665	5.30319	5.03612	4.79465	4.57529	19.7093	24.8011	-3.38082
Slovenia	2010		31204.4	7.26	0.49	2.11817	1.57	362	1507	5632	8222	1.725	5.27555	5.01118	4.77205	4.5547	19.6135	24.6798	-3.28408
Slovenia	2011		31411.6	8.18	0.49	2.13305	1.56	330	1470	5727	8136	1.621	13.2705	4.70461	4.49322	4.30001	26.7684	35.3789	-3.21814
Slovenia	2012		30524	8.85	0.51	2.061	1.58	325	1520	5638	8109	1.618	13.1924	4.68148	4.47212	4.28068	26.6267	35.1891	-2.91463
Slovenia	2013		30169.1	10.11	0.52	1.9311	1.55		1405	5690	8115	1.609	13.465	4.69686	4.48615	4.29354	26.9416	35.6382	-2.88936
Slovenia	2014	52.1	30970.4	9.7	0.5	1.84858	1.58	321	1521	5646	8074	1.65	13.2129	4.62061	4.41654	4.22973	26.4798	35.0205	-2.84798
Slovenia	2015	52.1	31631.8	8.98	0.49	1.78341	1.57	314	1540	5727	8066	1.692	12.7531	4.51068	4.316	4.13743	25.7173	33.9884	-2.76076
Slovenia	2016	52.1	32620.4	8.01	0.47	1.72402	1.58	349	1541	5825	8066	1.617	12.3541	4.38508	4.20087	4.03151	24.9716	32.9933	-2.72939
Slovenia	2017	52.1	34171.5	6.58	0.64	1.84542	1.62	369	1652	5756	7986	1.61	12.1912	4.20901	4.039	3.8822	24.3214	32.1769	-2.67193
Slovenia	2018	52.1	35587.9	5.13	0.63	1.8118	1.6	404	1650	5824	7916	1.725	11.6308	4.03535	3.87883	3.73399	23.279	30.7854	-2.33481
Slovenia	2019	52.1	36540.8	4.44	0.62	1.81464	1.61	395	1685		7989		11.1558	3.88737	3.74191	3.60694	22.392	29.6019	-2.19865
Slovenia	2020	52.1	34761.7	4.98			1.59						13.1936	4.43329	4.24509	4.07222	25.9442	34.3795	-2.18234
Slovenia	2021	52.1	37534.1	4.78			1.64						13.4849	4.52001	4.32454	4.14528	26.4748	35.0896	-2.0518
Spain	2002		33938.5		0.39	0.904795	1.25	154	789	4561	7631	1.344	1.48896	0.851153	1.20074	1.1865	4.72736	5.93593	0
Spain	2003		34310.5		0.39	1.05281	1.3	173	854	4687	7707	1.368	1.15811	0.881859	1.29374	1.32324	4.65695	5.74292	0
Spain	2004		34834.7		0.41	1.08195	1.31	189	880	4709	7710	1.367	2.13418	0.866595	1.23882	1.26775	5.50734	7.02969	-2.4082
Spain	2005	16	35442.5	9.17	0.43	1.1589	1.33	195	898	4832	7693	1.352	1.26958	1.02915	1.2109	1.23952	4.74915	5.9229	0
Spain	2006		36316.1	8.46	0.44	1.18116	1.36	217	957	4788	7716	1.313	2.06704	1.1636	1.16636	1.19445	5.59145	7.17321	-2.42496
Spain	2007		36897	8.22	0.45	1.4587	1.38	267	1029	5022	7707	1.299	1.75163	1.01037	1.80048	2.25064	6.81312	8.33786	-2.40197
Spain	2008		36619.4	11.27	0.49	1.33235	1.45	327	1176	4762	7738	1.579	2.04667	1.30119	2.38723	1.38688	7.12196	8.9066	-4.85923
Spain	2009		34949.3	17.87	0.54	1.72746	1.38	265	1029	4708	7621	1.702	1.79272	0.916242	1.63426	1.83131	6.17453	7.63941	-2.38985
Spain	2010	16	34859.6	19.88	0.55	1.55291	1.37	255	1009	4644	7548	1.709	2.05019	0.902177	1.6094	1.80389	6.36566	7.94006	-2.43356
Spain	2011	16	34447.2	21.41	0.54	1.46628	1.34	203	932	4567	7507	1.638	2.05083	1.02571	1.56549	1.75544	6.39747	8.00702	-2.44139
Spain	2012	16	33406.4	24.79	0.53	1.43745	1.32	194	903	4378	7436	1.505	2.06877	1.13638	1.59632	1.78947	6.59094	8.25342	-2.45299
Spain	2013	16	33060	26.12	0.53	1.44634	1.27		821	4549	7361	1.44	2.0632	1.16778	1.58752	1.77975	6.59825	8.26745	-2.45524
Spain	2014	16	33621.1	24.45	0.51	1.40779	1.32	194	896	4597	7431	1.464	2.05661	1.2049	1.57712	1.76827	6.6069	8.28406	-2.45791
Spain	2015	16	34945.5	22.07	0.5	1.3764	1.33	202	929	4585	7423	1.456	1.62355	0.879004	7.79483	1.34723	11.6446	13.7592	-2.35145
Spain	2016	16	35976.3	19.65	0.46	1.34411	1.34	227	967	4445	7370	1.429	1.62482	0.881487	7.80689	1.35085	11.664	13.7818	-2.3484
Spain	2017	16	36980.7	17.23	0.46	1.33958	1.31	231	963	4223	7251	1.415	1.6243	0.880863	7.8033	1.34995	11.6584	13.7752	-2.34863
Spain	2018	16	37666.9	15.27	0.46	1.43101	1.26	227	917	4085	7058	1.348	1.59456	0.848431	7.71416	2.05266	12.2098	14.3325	-2.346
Spain	2019	16	38107.2	14.11	0.47	1.47525	1.23	235	907	3877	6980	1.317	1.60318	0.858981	7.77605	2.01513	12.2533	14.3892	-2.34235
Spain	2020	16	33672.7	15.53			1.19	215	841	3859	6893	1.437	1.62807	1.26002	7.8622	1.83571	12.586	14.8737	-2.32674
Spain	2021	16	35847.1	14.79			1.19	213	843		6832	0	1.59114	1.2497	7.59866	1.99822	12.4377	14.6815	-2.34169
Sweden	2002		40369		1.12	3.05659	1.65	450	2010	6496	8251	1.943	3.96017	3.80932	4.65065	6.31163	18.7318	22.8586	0
Sweden	2003		41148.4		1.15	3.1111	1.71	513	2145	6658	8357	2.041	3.89637	3.75025	4.58114	6.22142	18.4492	22.5117	0
Sweden	2004		42764.4		1.17	3.09991	1.75	522	2199	6774	8447	1.978	3.76304	3.62657	4.43535	6.03184	17.8568	21.7847	0
Sweden	2005	60	43811.1	7.78	1.22	3.12875	1.77	540	2199	7034	8434	1.955	3.61555	3.48939	4.27323	5.8204	17.1986	20.9772	0
Sweden	2006		45596.9	7.24	1.3	3.21723	1.85	597	2386	7094	8592	2.023	3.84885	4.05918	4.76241	6.18426	18.8547	23.0238	0
Sweden	2007		46816.6	6.32	1.31	3.17523	1.88	626	2456	7141	8624	1.94	3.51864	3.72275	4.38187	5.71085	17.3341	21.1566	0
Sweden	2008		46244	6.35	1.41	3.30224	1.91	654	2497	7218	8672	2.016	3.3415	3.5414	4.17571	5.45293	16.5115	20.1473	0
Sweden	2009		43861.8	8.48	1.49	3.4807	1.94	634	2496	7309	8713	2.078	3.185	3.38066	3.99237	5.22271	15.7807	19.251	0
Sweden	2010	60	46078	8.78	1.46	3.37428	1.98	689	2617	7064	8749	2.074	3.10903	3.44604	4.17516	5.48945	16.2197	19.7166	0
Sweden	2011	60	47192.6	7.95	1.47	3.3718	1.9	618	2404	7051	8614	1.995	3.03873	3.37041	4.08652	5.37748	15.8731	19.2932	0
Sweden	2012	60	46569.2	8.15	1.55	3.49192	1.91	625	2413	6972	8611	1.98	2.95109	3.276	3.97567	5.23719	15.44	18.7641	0
Sweden	2013	60	46724.8	8.21	1.58	3.54351	1.89		2410	6860	8551	1.921	2.89195	3.21219	3.90064	5.14206	15.1468	18.4062	0
Sweden	2014	60	47493	8.1	1.59	3.53951	1.88	667	2409	6744	8465	1.889	2.79544	3.10791	3.77783	4.98606	14.6672	17.8207	0
Sweden	2015	60	49103.1	7.59	1.56	3.45672	1.85	647	2350	6723	8392	1.903	2.75715	3.06648	3.72897	4.92389	14.4765	17.5879	0
Sweden	2016	55.7	49494.1	7.15	1.58	3.49499	1.85	688	2404	6472	8366	1.958	2.69976	3.00433	3.65561	4.83043	14.1901	17.2384	0
Sweden	2017	55.7	50085.6	6.86	1.58	3.3836	1.78	655	2268	6395	8224	1.857	2.64526	2.94524	3.58576	4.74133	13.9176	16.9059	0
Sweden	2018	55.7	50472.5	6.47	1.59	3.46362	1.76	615	2236	6243	8155	1.914	2.57144	2.86512	3.49093	4.62017	13.5477	16.4546	0
Sweden	2019	55.7	50955.8	6.91	1.56	3.42096	1.71	567	2088	6138	8069	1.957	3.16346	3.43443	4.34023	5.1371	16.0752	19.5927	0
Sweden	2020	55.7	49491	8.48			1.67	519	1992	6150	8012	1.898	3.10679	3.37476	4.26729	5.0543	15.8031	19.2594	0
Sweden	2021	55.7	52218.7	8.89			1.67	522	2039		7939	1.918	3.00066	3.26284	4.13023	4.89841	15.2921	18.6336	0
Switzerland	2002		57054.2		0.28	1.48311	1.39	257	1400	5288	7362	1.585	2.8543	2.80062	2.70559	2.53992	10.9004	13.6928	0
Switzerland	2003		56623.2		0.28	1.48716	1.39	243	1383	5270	7393	1.648	2.85378	2.7746	2.49586	2.35781	10.482	13.2279	0
Switzerland	2004		57766.8		0.28	1.44287	1.42	250	1390	5377	7550	1.707	2.7806	2.67815	2.4602	2.30187	10.2208	12.8912	0
Switzerland	2005	8	59005.2	8.24	0.29	1.45226	1.42	249	1386	5374	7621	1.665	2.78056	2.72883	2.4789	2.32792	10.3162	13.0082	0
Switzerland	2006		61027.9	7.27292	0.28	1.44192	1.44	258	1415	5420	7671	1.679	2.74875	2.69108	2.46738	2.27726	10.1845	12.8441	0
Switzerland	2007		62855.2	6.31625	0.28	1.8474	1.46	270	1415	5467	7695	1.706	3.04096	2.8939	2.61312	2.469	11.017	13.9126	0
Switzerland	2008		63861.9	6.36	0.27	1.33113	1.48	299	1485	5523	7753	1.753	2.94138	2.80529	2.75066	2.65103	11.1484	13.995	0
Switzerland	2009		61696.3	9.23958	0.29	1.79916	1.5	301	1492	5595	7824	1.74	3.3796	3.23031	3.12923	4.55326	14.2924	17.6521	0
Switzerland	2010	14	63220.7	4.8	0.28	1.81672	1.52	303	1539	5570	7930	1.742	3.25748	3.10888	3.01047	2.92248	12.2993	15.4473	0
Switzerland	2011	14	63760.4	4.4	0.3	1.81262	1.52	296	1506	5569	7942	1.73	3.43417	3.31055	2.90958	2.67953	12.3338	15.607	0
Switzerland	2012	14	63830.9	4.48	0.31	1.97578	1.52	305	1513	5509	7930	1.67	3.40457	3.24358	2.97221	2.63094	12.2513	15.4923	0
Switzerland	2013	14	64232	4.75	0.32	1.98755	1.52		1493	5573	7932	1.712	3.61355	3.46066	3.23453	4.51676	14.8255	18.3851	0
Switzerland	2014	14	64944.1	4.83	0.37	2.04445	1.54	301	1549	5582	8029	1.731	3.66795	3.48923	3.20235	5.48683	15.8464	19.4954	0
Switzerland	2015	14	65265.1	4.8	0.5	2.21671	1.54	311	1549	5611	8035	1.638	3.6631	3.49856	3.16103	6.56012	16.8828	20.5921	0
Switzerland	2016	14	65891.7	4.92	0.5	2.20582	1.54	316	1542	5536	8082	1.649	3.59798	3.42341	3.15392	6.43938	16.6147	20.2594	0
Switzerland	2017	14	66169.3	4.8	0.51	2.24306	1.52	298	1503	5486	7990	1.659	3.52799	3.35792	3.09181	2.64155	12.6193	15.973	0
Switzerland	2018	14	67562.5	4.71	0.49	2.20021	1.52	309	1498	5347	7959	1.671	3.51538	3.35438	3.1062	2.66058	12.6366	15.9861	0
Switzerland	2019	14	67848.4	4.39	0.49	2.22018	1.48	286	1412	5252	7909	1.581	3.46441	3.3171	3.09157	2.64114	12.5142	15.8242	0
Switzerland	2020	14	65911.9	4.82			1.46	286	1414	5469	7838	1.588	3.45848	3.32853	3.13596	7.78173	17.7047	21.3299	0
Switzerland	2021	14	68936	5.1			1.52	309	1506		7897	1.664	3.43107	3.30185	3.55662	4.6844	14.9739	18.4438	0
United Kingdom	2002		38101		0.72	2.53178	1.63						5.14357	1.99089	1.95203	1.91466	11.0011	14.4383	0
United Kingdom	2003		39121.3		0.69	3.10443	1.7						4.43078	1.98276	1.94421	1.90713	10.2649	13.3677	0
United Kingdom	2004		39861.4		0.76	2.87389	1.75						4.94787	1.93087	1.89429	1.85908	10.6321	13.9471	0
United Kingdom	2005	26	40639.3	4.8	0.75	3.14455	1.76						4.90439	1.9394	1.9025	1.86698	10.6133	13.9126	0
United Kingdom	2006		41325.8	5.42	0.79	2.82525	1.82						4.839	1.93346	1.89679	1.86148	10.5307	13.7967	0
United Kingdom	2007		42068.5	5.33	0.72	3.36555	1.86						4.68492	1.89465	1.85942	1.82548	10.2645	13.4387	0
United Kingdom	2008		41630.6	5.7	0.71	3.31971	1.91						4.70537	1.92613	1.88974	1.85469	10.3759	13.5762	0
United Kingdom	2009		39430.7	7.63	0.77	3.66459	1.89						4.86425	2.0088	1.96924	1.93121	10.7735	14.0908	0
United Kingdom	2010	39	39992.9	7.88	0.75	4.24837	1.92						4.7931	1.99117	1.9523	1.91491	10.6515	13.9265	0
United Kingdom	2011	39	40115.3	8.13	0.77	4.09965	1.91						3.15508	2.01896	1.97901	4.13624	11.2893	13.9523	0
United Kingdom	2012	39	40453.7	7.97	0.75	4.02683	1.92						3.04384	1.94988	1.91259	3.8792	10.7855	13.3491	0
United Kingdom	2013	39	40921.2	7.6	0.73	3.76986	1.83						2.97388	1.90636	1.8707	3.77154	10.5225	13.0268	0
United Kingdom	2014	39	41908	6.17	0.58	3.6	1.81					2.168	2.97622	1.91035	1.87454	4.12397	10.8851	13.4135	0
United Kingdom	2015	39	42500.9	5.35	0.63	3.54123	1.8					2.175	2.90723	1.86975	1.83543	2.98168	9.5941	12.0029	0
United Kingdom	2016	39	42962.4	4.9	0.54	3.40866	1.79					2.09	2.83707	1.82587	1.79313	1.76155	8.21762	10.5001	0
United Kingdom	2017	39	43841.3	4.42	0.56	3.31063	1.74					1.94	2.74258	1.76668	1.73601	1.70639	7.95167	10.1592	0
United Kingdom	2018	39	44191.7	4.1	0.54	3.07766	1.68					1.864	2.67199	1.7224	1.69323	1.66504	7.75266	9.90418	0
United Kingdom	2019	39	44674.4	3.83	0.52	2.48649	1.63					1.797	2.57169	1.65936	1.63228	4.28948	10.1528	12.3857	0
United Kingdom	2020	39	39876.7	4.58	0.52		1.56						2.66893	1.72274	2.34735	5.95837	12.6974	15.187	2.24965
United Kingdom	2021	39	43371.5	4.53			1.56						2.54604	1.64348	1.6169	4.74176	10.5482	12.7888	1.35533
